# Supplementary material
Source: PubMed Central journal article supplement (PMC2636973)

# Supporting Information

for

## **Carbonylative Cross-Coupling of *ortho*-Disubstituted Aryl Iodides. Convenient Synthesis of Sterically Hindered Aryl Ketones.**

B. Michael O'Keefe, Nicholas Simmons, and Stephen F. Martin\*

*Department of Chemistry and Biochemistry, The University of Texas at Austin,  
Austin TX, 78712*

[sfmartin@mail.utexas.edu](mailto:sfmartin@mail.utexas.edu)

## Experimental Procedures:

**General.** Unless otherwise noted, solvents and reagents were used without further purification. Tetrahydrofuran was dried by filtration through two columns of activated, neutral alumina according to the procedure described by Grubbs.<sup>1</sup> Dioxane was distilled from sodium metal and benzophenone prior to use. *N*-methylpyrrolidinone was dried over 4 Å MS before use. Dimethylformamide was dried by filtration through two columns of activated molecular sieves. ZnBr<sub>2</sub> was sublimed under reduced pressure before use and stored in a desiccator. Cs<sub>2</sub>CO<sub>3</sub> powder was purchased from Alfa Aesar (Stock # 12887) and stored in a desiccator. The source of Cs<sub>2</sub>CO<sub>3</sub> (and particle size) may be critical for the success of the reaction. CO<sub>(g)</sub> (99.9%) was obtained from Praxair. All reactions involving air or moisture sensitive reagents or intermediates were performed under an inert atmosphere of nitrogen or argon in glassware that was flame dried.

### Carbonylative Suzuki Cross-Coupling of *ortho*-Disubstituted Aryl Iodides (60 psi, Method A):

The aryl iodide (1.0 mmol), boronic acid (2.0 mmol), PEPPSI-*i*Pr (0.03 mmol) and Cs<sub>2</sub>CO<sub>3</sub> (2.5 mmol) were placed into a 10 ml glass sleeve fitted with a rubber septum. The sleeve was then evacuated and backfilled with CO<sub>(g)</sub> three times. Dioxane (5.0 mL) was added, and the mixture sparged with CO<sub>(g)</sub> for 2 min, whereupon the rubber septum was removed, and the glass sleeve was quickly sealed in a stainless steel pressure reactor. The reactor was evacuated and backfilled with CO<sub>(g)</sub> (3 cycles, 60 psi). The reactor was heated at 140 °C (oil bath) with stirring for 24 h at 60 psi of CO<sub>(g)</sub>. The reaction mixture was filtered through a pad of Celite, eluting with EtOAc. The filtrate was washed with H<sub>2</sub>O (20 mL), brine (20 mL), dried (MgSO<sub>4</sub>), filtered and the organics were concentrated under reduced pressure. The crude residue was purified by flash column chromatography, eluting with the indicated solvent to afford the desired benzophenone.

---

(1) Pangborn, A. B.; Giardello, M. A.; Grubbs, R. H.; Rosen, R. K.; Timmers, F. J. *Organometallics* **1996**, *15*, 1518.

**Carbonylative Suzuki Cross-Coupling of *ortho*-Disubstituted Aryl Iodides (balloon pressure, Method B):**

The aryl iodide (1.0 mmol), boronic acid (2.0 mmol), PEPPSI-*i*Pr (0.03 mmol) and Cs<sub>2</sub>CO<sub>3</sub> (3.0 mmol) were placed into a 25 mL round bottomed flask that was fitted with a reflux condenser. Chlorobenzene (5 mL) was added, and the flask was evacuated and backfilled with CO<sub>(g)</sub> (3 cycles). The mixture was heated to 80 °C (oil bath) with stirring for 24 h under a balloon of CO<sub>(g)</sub>. The reaction mixture was filtered through a pad of Celite, eluting with EtOAc, and the filtrate was washed with H<sub>2</sub>O (20 mL), brine (20 mL), dried (MgSO<sub>4</sub>), filtered and the organics were concentrated under reduced pressure. The crude residue was purified by flash column chromatography, eluting with the indicated solvent to afford the desired benzophenone.

**Carbonylative Negishi Coupling of *ortho*-Disubstituted Aryl Iodides with Alkynyl-zinc Reagents (Method C):**

*n*-BuLi (0.63 mmol, 2.12 M solution in hexanes) was added dropwise to a solution of the alkyne (0.60 mmol) in THF (1.0 mL) at -78 °C. The resultant solution was stirred for 30 min, whereupon a solution of ZnBr<sub>2</sub> (0.63 mmol) in THF (0.65 mL) was added. The cooling bath was removed, and the solution was warmed to ambient temperature. The aryl iodide (0.30 mmol), PEPPSI-*i*Pr (0.009 mmol) and LiBr (0.90 mmol) were placed into a dry, 10 mL glass sleeve. The sleeve was placed into the metal jacket of the stainless steel pressure reactor, fitted with a rubber septum, and placed under nitrogen. NMP (2 mL) was added, and the mixture was cooled to -78 °C, whereupon the previously prepared zinc acetylide solution (2 mL, 0.3 M) was added dropwise. The jacket was removed from the bath, and the pressure reactor was sealed. The reactor was evacuated and backfilled with CO<sub>(g)</sub> (3 cycles, 60 psi). The reactor was heated to 80 °C (oil bath) with stirring for 24 h at 60 psi of CO<sub>(g)</sub>. The reaction mixture was diluted with CH<sub>2</sub>Cl<sub>2</sub> (20 mL) and brine (20 mL). The layers were separated, and the aqueous layer was extracted with CH<sub>2</sub>Cl<sub>2</sub> (2 x 10 mL). The combined organics were dried (MgSO<sub>4</sub>), filtered and were concentrated under reduced pressure. The crude residue was purified

by flash column chromatography, eluting with the indicated solvent to deliver the desired ketone.

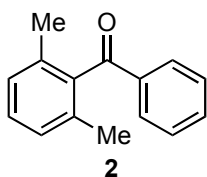

**2,6-Dimethylbenzophenone (2).** Method A: 82%. Method B: 95% of **2** as an off-white solid (98:2 hexanes/EtOAc); mp = 64 °C;  $^1\text{H}$  NMR (400 MHz,  $\text{CDCl}_3$ )  $\delta$  7.78 (d,  $J = 7.2$  Hz, 2 H), 7.57 (comp, 1 H), 7.43 (t,  $J = 7.9$  Hz, 2 H), 7.22 (t,  $J = 7.0$  Hz, 1 H), 7.06 (d,  $J = 7.0$  Hz, 2 H), 2.10 (s, 6 H);  $^{13}\text{C}$  NMR (100 MHz,  $\text{CDCl}_3$ )  $\delta$  200.5, 139.6, 136.9, 134.1, 133.7, 129.4, 128.8, 128.7, 127.5, 19.4; IR (neat) 3061, 1673  $\text{cm}^{-1}$ ; mass spectrum (CI)  $m/z$  211.1123 [ $\text{C}_{15}\text{H}_{15}\text{O}$  ( $M + 1$ ) requires 211.1123], 421, 212, 211.

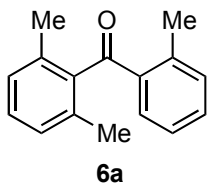

**2,2',6-Trimethylbenzophenone (6a).** Method A: 93%. Method B: 99% of **6a** as a white solid (98:2 hexanes/EtOAc): mp = 68-69 °C;  $^1\text{H}$  NMR (400 MHz,  $\text{CDCl}_3$ )  $\delta$  7.42-7.36 (m, 2 H), 7.31 (d,  $J = 7.2$  Hz, 1 H), 7.24-7.20 (m, 1 H), 7.16 (t,  $J = 7.5$  Hz, 1 H), 7.06 (d,  $J = 7.5$  Hz, 2 H), 2.73 (s, 3 H), 2.14 (s, 6 H);  $^{13}\text{C}$  NMR (100 MHz,  $\text{CDCl}_3$ )  $\delta$  202.3, 141.1, 140.1, 136.4, 134.1, 132.3, 132.2, 131.9, 128.6, 127.6, 125.9, 21.8, 19.3; IR (neat) 2922, 1665, 1454  $\text{cm}^{-1}$ ; mass spectrum (CI)  $m/z$  225.1280 [ $\text{C}_{16}\text{H}_{17}\text{O}$  ( $M + 1$ ) requires 225.1279], 253, 226, 225.

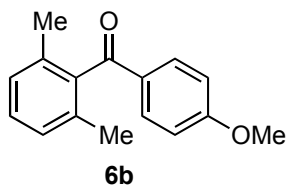

**2,6-Dimethyl-4'-methoxybenzophenone (6b).** Method A: >99%. Method B: 75% of **6b** as a yellow oil that solidified on standing (9:1 hexanes/EtOAc): mp = 37-38 °C;  $^1\text{H}$  NMR (400 MHz,  $\text{CDCl}_3$ )  $\delta$  7.75 (comp, 2 H), 7.19 (t,  $J = 7.7$  Hz, 1 H), 7.03 (d,

$J = 7.7$  Hz, 2 H), 6.89 (d,  $J = 8.9$  Hz, 2 H), 3.82 (s, 3 H), 2.10 (s, 6 H);  $^{13}\text{C}$  NMR (100 MHz,  $\text{CDCl}_3$ )  $\delta$  198.8, 163.9, 139.8, 133.9, 131.6, 130.0, 128.4, 127.4, 113.9, 55.3, 19.2; IR (neat) 2954, 1665  $\text{cm}^{-1}$ ; mass spectrum (CI)  $m/z$  241.1228 [ $\text{C}_{16}\text{H}_{17}\text{O}_2$  ( $M + 1$ ) requires 241.1229], 481, 242, 241.

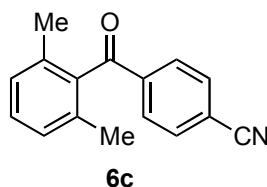

**4'-Cyano-2,6-dimethylbenzophenone (6c).** Method A: 43%. Method B: 13% of **6c** as an off-white solid (9:1 hexanes/EtOAc): mp = 90-91 °C;  $^1\text{H}$  NMR (400 MHz,  $\text{CDCl}_3$ )  $\delta$  7.87 (d,  $J = 8.4$  Hz, 2 H), 7.74 (d,  $J = 8.4$  Hz, 2 H), 7.25 (t,  $J = 7.5$  Hz, 1 H), 7.07 (d,  $J = 7.5$  Hz, 2 H), 2.07 (s, 6 H);  $^{13}\text{C}$  NMR (100 MHz,  $\text{CDCl}_3$ )  $\delta$  198.9, 139.7, 138.2, 134.1 (2C), 132.7 (2C), 129.5 (2C), 129.3, 127.8 (2C), 117.8, 116.8, 19.3 (2C); IR (neat) 2922, 2231, 1676  $\text{cm}^{-1}$ ; mass spectrum (CI)  $m/z$  236.1079 [ $\text{C}_{16}\text{H}_{13}\text{NO}$  ( $M + 1$ ) requires 236.1075], 268, 264, 236.

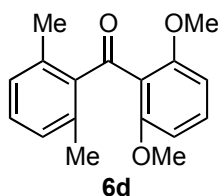

**2,6-Dimethyl-2',6'-dimethoxybenzophenone (6d).** Method A: 62%. Method B: 95% of **6d** as an off-white solid (9:1  $\rightarrow$  0:1 hexanes/EtOAc): mp = 139-140 °C;  $^1\text{H}$  NMR (400 MHz,  $\text{CDCl}_3$ )  $\delta$  7.28 (t,  $J = 8.4$  Hz, 1 H), 7.09 (t,  $J = 7.6$  Hz, 1 H), 6.94 (d,  $J = 7.6$  Hz, 2 H), 6.52 (d,  $J = 8.4$  Hz, 2 H), 3.63 (s, 6 H), 2.20 (s, 6 H);  $^{13}\text{C}$  NMR (100 MHz,  $\text{CDCl}_3$ )  $\delta$  199.1, 158.5, 142.2, 135.1, 132.0, 128.4, 127.6, 120.4, 104.4, 55.8, 19.5; IR (neat) 2951, 1666  $\text{cm}^{-1}$ ; mass spectrum (CI)  $m/z$  271.1337 [ $\text{C}_{17}\text{H}_{19}\text{O}_3$  ( $M + 1$ ) requires 271.1334], 272, 271, 239, 165.

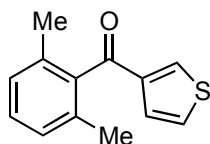

**6e**

**3-(2',6'-Dimethylbenzoyl)thiophene (6e).** Method B: 50% of **6e** as a pale orange/pink solid (9:1 hexanes/EtOAc): mp = 65-66 °C; <sup>1</sup>H NMR (400 MHz, CDCl<sub>3</sub>) δ 7.71 (dd, *J* = 2.9, 1.2 Hz, 1 H), 7.53 (dd, *J* = 5.1, 1.2 Hz, 1 H), 7.32 (dd, *J* = 5.1, 2.9 Hz, 1 H), 7.20 (t, *J* = 7.6 Hz, 1 H), 7.04 (d, *J* = 7.6 Hz, 2 H), 2.14 (s, 6 H); <sup>13</sup>C NMR (100 MHz, CDCl<sub>3</sub>) δ 194.1, 143.0, 140.4, 135.1, 133.9, 128.7, 127.5, 127.0, 126.9, 19.3; IR (neat) 2921, 1659 cm<sup>-1</sup>; mass spectrum (CI) *m/z* 217.0692 [C<sub>13</sub>H<sub>12</sub>OS (M + 1) requires 217.0687], 433, 327, 245, 218, 217.

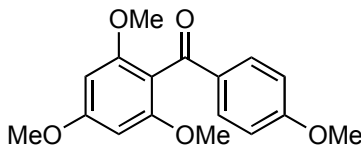

**6f**

**2,4,4',6-Tetramethoxybenzophenone (6f)** Method B: 52% of **6f** as a white solid (9:1 → 4:1 hexanes/EtOAc): mp = 144 °C (EtOH); <sup>1</sup>H NMR (400 MHz, CDCl<sub>3</sub>) δ 7.81-7.77 (comp, 2 H), 6.88-6.84 (comp, 2 H), 6.14 (s, 2 H), 3.82 (s, 3 H), 3.81 (s, 3 H), 3.65 (s, 6 H); <sup>13</sup>C NMR (100 MHz, CDCl<sub>3</sub>) δ 193.6, 163.4, 162.1, 158.4, 131.7, 131.3, 113.4, 111.1, 90.6, 55.7, 55.37, 55.33; IR (neat) 2940, 1661 cm<sup>-1</sup>; mass spectrum (ESI) *m/z* 303.12270 [C<sub>17</sub>H<sub>19</sub>O<sub>5</sub> (M + 1) requires 303.1231], 331, 304, 303.

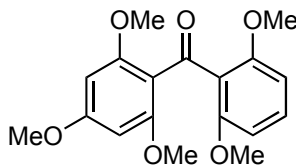

**6g**

**2,2',4,6,6'-Pentamethoxybenzophenone (6g).** Method B: 33% of **6g** as a tan solid (9:1 → 0:1 hexanes/EtOAc): mp = 142-143 °C; <sup>1</sup>H NMR (400 MHz, CDCl<sub>3</sub>) δ 7.18 (t, *J* = 8.3 Hz, 1 H), 6.49 (d, *J* = 8.3 Hz, 2 H), 6.04 (s, 2 H), 3.79 (s, 3 H), 3.67 (s, 6 H), 3.64 (s, 6 H); <sup>13</sup>C NMR (100 MHz, CDCl<sub>3</sub>) δ 192.8, 162.6, 160.3, 157.91, 130.1, 122.9, 115.0, 104.4, 91.0, 56.25, 56.28, 55.3; IR (neat) 2939, 1673 cm<sup>-1</sup>; mass spectrum (ESI) *m/z* 333.13327 [C<sub>18</sub>H<sub>21</sub>O<sub>6</sub> (M + 1) requires 333.1338], 361, 334, 333.

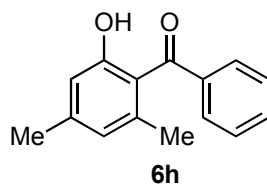

**2-Hydroxy-4,6-dimethylbenzophenone (6h).** Method B ( $K_2CO_3$  was used as the base): 51% of **6h** as an off-white solid (9:1 hexanes/EtOAc): mp = 138-139 °C;  $^1H$  NMR (400 MHz,  $CDCl_3$ )  $\delta$  9.41 (s, 1 H), 7.66-7.63 (comp, 2 H), 7.56-7.52 (comp, 1 H), 7.45-7.41 (comp, 2 H), 6.69 (s, 1 H), 6.55 (s, 1 H), 2.30 (s, 3 H), 1.91 (s, 3 H);  $^{13}C$  NMR (100 MHz,  $CDCl_3$ )  $\delta$  201.4, 159.4, 144.6, 140.4, 138.8, 132.6, 128.8, 128.6, 124.0, 120.2, 115.4, 22.6, 21.6; IR (neat) 3352 (br), 2922, 1651  $cm^{-1}$ ; mass spectrum (ESI)  $m/z$  249.08860 [ $C_{15}H_{14}O_2Na$  (M + Na) requires 249.0891], 255, 228, 227.

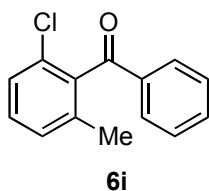

**2-Chloro-6-methylbenzophenone (6i).** Method B: 89% of **6i** as a colorless oil that solidified upon standing (9:1 hexanes/EtOAc): mp = 54-55 °C;  $^1H$  NMR (400 MHz,  $CDCl_3$ )  $\delta$  7.81-7.79 (comp, 2 H), 7.59-7.54 (comp, 1 H), 7.46-7.41 (comp, 2 H), 7.26-7.23 (comp, 2 H), 7.15-7.13 (comp, 1 H), 2.15 (s, 3 H);  $^{13}C$  NMR (100 MHz,  $CDCl_3$ )  $\delta$  196.3, 138.4, 136.8, 136.1, 133.9, 130.2, 129.8, 129.4, 128.8, 128.6, 126.7, 19.2; IR (neat) 3061, 1674  $cm^{-1}$ ; mass spectrum (CI)  $m/z$  231.0579 [ $C_{14}H_{12}ClO$  (M + 1) requires 231.0577], 233, 232, 231.

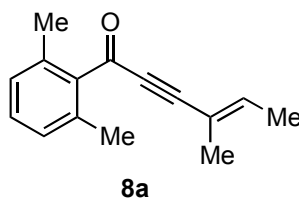

**(E)-1-(2',6'-dimethylphenyl)-4-methylhex-4-en-2-yn-1-one (8a).** Method A: 49% of **8a** as a yellow oil (9:1 hexanes/EtOAc);  $^1H$  NMR (400 MHz,  $CDCl_3$ )  $\delta$  7.16 (t,  $J$  = 7.7 Hz, 1 H), 7.01 (d,  $J$  = 7.7 Hz, 2 H), 6.27 (qq,  $J$  = 7.2, 1.7 Hz, 1 H), 2.35 (s, 6 H), 1.82 (comp, 3 H), 1.75 (comp, 3 H);  $^{13}C$  NMR (100 MHz,  $CDCl_3$ )  $\delta$  184.6, 141.1, 140.5,

134.6, 129.3, 128.1, 117.1, 97.6, 86.8, 19.6, 16.1, 14.7; IR (neat) 2924, 2180, 1646  $\text{cm}^{-1}$ ; mass spectrum (CI)  $m/z$  213.1276 [ $\text{C}_{15}\text{H}_{17}\text{O}$  ( $M + 1$ ) requires 213.1279], 213, 213.

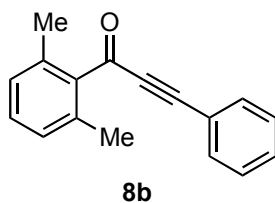

**1-(2',6'-Dimethylphenyl)-3-phenylprop-2-yn-1-one (8b).** Method C: 80% of **8b** as a light yellow oil (9:1 hexanes/EtOAc):  $^1\text{H}$  NMR (400 MHz,  $\text{CDCl}_3$ )  $\delta$  7.58-7.55 (comp, 2 H), 7.47-7.42 (comp, 1 H), 7.39-7.34 (comp, 2 H), 7.21 (t,  $J = 7.7$  Hz, 1 H), 7.06 (d,  $J = 7.7$  Hz, 2 H), 2.42 (s, 6 H);  $^{13}\text{C}$  NMR (100 MHz,  $\text{CDCl}_3$ )  $\delta$  184.4, 140.1, 134.8, 133.2, 130.9, 129.6, 128.6, 128.2, 119.9, 93.6, 89.3, 19.6; IR (neat) 2959, 2191, 1645  $\text{cm}^{-1}$ ; mass spectrum (CI)  $m/z$  235.1126 [ $\text{C}_{17}\text{H}_{14}\text{O}$  ( $M + 1$ ) requires 235.1123], 470, 469, 236, 235, 133.

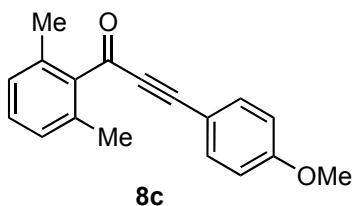

**1-(2',6'-Dimethylphenyl)-3-(4''-methoxyphenyl)prop-2-yn-1-one (8c).** Method C: 75% of **8c** as a yellow oil (9:1 hexanes/EtOAc):  $^1\text{H}$  NMR (400 MHz,  $\text{CDCl}_3$ )  $\delta$  7.53-7.50 (comp, 2 H), 7.20 (t,  $J = 7.7$  Hz, 1 H), 7.05 (d,  $J = 7.7$  Hz, 2 H), 6.89-6.85 (comp, 2 H), 3.82 (s, 3 H), 2.40 (s, 6 H);  $^{13}\text{C}$  NMR (100 MHz,  $\text{CDCl}_3$ )  $\delta$  184.5, 161.8, 140.4, 135.3, 134.7, 129.4, 128.1, 114.3, 111.7, 95.0, 89.4, 55.4, 19.6; IR (neat) 2961, 2183, 1643  $\text{cm}^{-1}$ ; mass spectrum (CI)  $m/z$  265.1229 [ $\text{C}_{18}\text{H}_{17}\text{O}_2$  ( $M + 1$ ) requires 265.1229], 529, 266, 265.

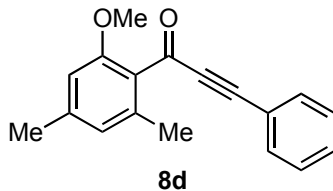

**1-(2'-Methoxy-4',6'-dimethylphenyl)-3-phenylprop-2-yn-1-one (8d).** Method C (3 mol %  $\text{PPh}_3$  was added to the reaction mixture and the pressure was increased to 170



psi of CO): 67% of **8d** as a yellow oil (9:1 hexanes/EtOAc):  $^1\text{H}$  NMR (400 MHz,  $\text{CDCl}_3$ )  $\delta$  7.55-7.53 (comp, 2 H), 7.43-7.39 (comp, 1 H), 7.36-7.32 (comp, 2 H), 6.64 (s, 1 H), 6.62 (s, 1 H), 3.85 (s, 3 H), 2.35 (s, 3 H), 2.33 (s, 3 H);  $^{13}\text{C}$  NMR (100 MHz,  $\text{CDCl}_3$ )  $\delta$  181.0, 158.0, 141.9, 137.5, 133.0, 130.4, 128.5, 126.7, 124.0, 120.6, 110.0, 90.9, 90.1, 55.8, 21.7, 19.5; IR (neat) 2925, 2193, 1644  $\text{cm}^{-1}$ ; mass spectrum (ESI)  $m/z$  265.12231 [ $\text{C}_{18}\text{H}_{17}\text{O}_2$  ( $M + 1$ ) requires 265.1228], 288, 265, 163.

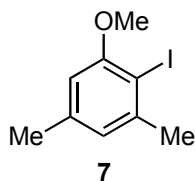

**2-Iodo-1-methoxy-3,5-dimethylbenzene (7).** Sodium hydride (0.32 g, 8.1 mmol) was added in one portion to a solution of 2-iodo-3,5-dimethylphenol (1.0 g, 4.0 mmol) and methyl iodide (1.3 mL, 20.2 mmol) in DMF (20 mL) at 0 °C. After gas evolution had subsided, the cooling bath was removed, and the mixture was stirred at ambient temperature for 30 min. The mixture was recooled to 0 °C, whereupon saturated  $\text{NH}_4\text{Cl}$  (10 mL) was slowly added. The mixture was diluted with EtOAc (50 mL), and the layers were separated. The organic layer was washed with  $\text{H}_2\text{O}$  (4 x 50 mL) and brine (50 mL), dried ( $\text{MgSO}_4$ ), filtered, and was concentrated. The crude residue was purified by flash column chromatography, eluting with hexanes/ethyl acetate (9:1), to afford 0.95 g (90%) of **7** as a white solid: mp = 43-44 °C;  $^1\text{H}$  NMR (400 MHz,  $\text{CDCl}_3$ )  $\delta$  6.72 (s, 1 H), 6.46 (s, 1 H), 3.85 (s, 3 H), 2.43 (s, 3 H), 2.30 (s, 3 H);  $^{13}\text{C}$  NMR (100 MHz,  $\text{CDCl}_3$ )  $\delta$  157.8, 142.7, 138.7, 123.2, 109.0, 88.8, 56.2, 28.4, 21.1; IR (neat) 2936, 1572, 1457  $\text{cm}^{-1}$ ; mass spectrum (ESI)  $m/z$  262.99273 [ $\text{C}_9\text{H}_{12}\text{IO}$  ( $M + 1$ ) requires 262.9927], 263, 262.

bmo5118

exptl std1h

|         |             |            |          |
|---------|-------------|------------|----------|
| date    | JUL 26 2008 | DEC. & VT  | 400.269  |
| solvent | CDCl3       | dh         | H1       |
| file    | exp         | dbwr       | 30       |
| file    | ACQUISITION | dot        | 0        |
| sfreq   | 400.269     | dm         | nmn      |
| tn      | H1          | dm         | c        |
| at      | 2.856       | dmf        | 200      |
| np      | 32000       | PROCESsing | 0.10     |
| sw      | 5602.2      | lb         | not used |
| fb      | not used    | wcfile     | ft       |
| bs      | 1           | fn         | not used |
| tpwr    | 58          | fn         | not used |
| pw      | 2.0         | werr       |          |
| d1      | 2.000       | wexp       |          |
| tof     | 169.9       | wbs        |          |
| nt      | 16          | wrt        |          |
| ct      | 16          |            |          |
| alock   | n           |            |          |
| gain    | not used    |            |          |
| fl      | FLAGS       |            |          |
| in      | n           |            |          |
| in      | n           |            |          |
| dp      | y           |            |          |
| sp      | DISPLAY     |            |          |
| wp      | -620.9      |            |          |
| vs      | 5601.9      |            |          |
| sc      | 145         |            |          |
| vc      | 0           |            |          |
| wc      | 250         |            |          |
| h2mm    | 1.94        |            |          |
| ls      | 228.91      |            |          |
| rfl     | 3519.2      |            |          |
| rfd     | 2897.9      |            |          |
| th      | 20          |            |          |
| ins     | 2.000       |            |          |
| nm      | cdc         | ph         |          |

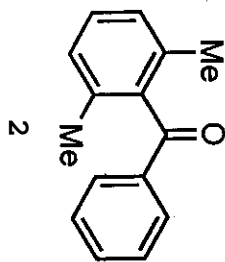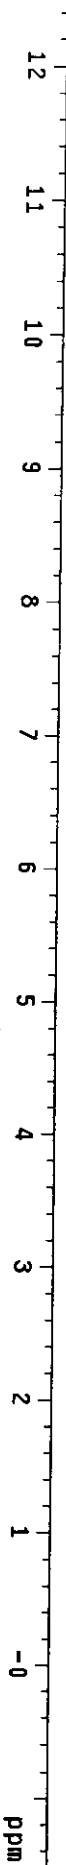

bmos118

expl std13c

|             |             |            |          |
|-------------|-------------|------------|----------|
| date        | JUL 26 2008 | DEC. & VT  | 400.269  |
| solvent     | CDCl3       | dn         | H1       |
| file        | exp         | dpwr       | 38       |
| ACQUISITION |             | doF        | 0        |
| sfrq        | 100.658     | dm         | YYY      |
| tn          | C13         | dmm        | W        |
| at          | 1.280       | dmf        | 9300     |
| np          | 64484       | PROCESSING | 1.00     |
| sw          | 25188.9     | lb         | ft       |
| fb          | 13800       | wtfile     | not used |
| bs          | 18          | proc       | fn       |
| tpwr        | 60          |            |          |
| pw          | 3.0         |            |          |
| d1          | 2.000       | werr       |          |
| tof         | 1539.5      | wexp       |          |
| nt          | 256         | wbs        |          |
| ct          | 184         | wnt        |          |
| atlock      | 184         |            |          |
| gain        | not used    |            |          |
| FLAGS       | not used    |            |          |
| fl          | n           |            |          |
| fn          | n           |            |          |
| dp          | y           |            |          |
| DISPLAY     |             |            |          |
| SP          | -1553.8     |            |          |
| WP          | 25188.1     |            |          |
| VS          | 153         |            |          |
| SC          | 0           |            |          |
| WC          | 250         |            |          |
| Hzmm        | 100.75      |            |          |
| IS          | 500.00      |            |          |
| rfl         | 9304.4      |            |          |
| rffp        | 7749.8      |            |          |
| th          | 20          |            |          |
| ins         | 100.000     |            |          |
| nm          | cdc         |            |          |
| ph          |             |            |          |

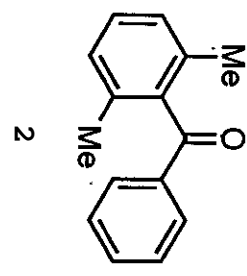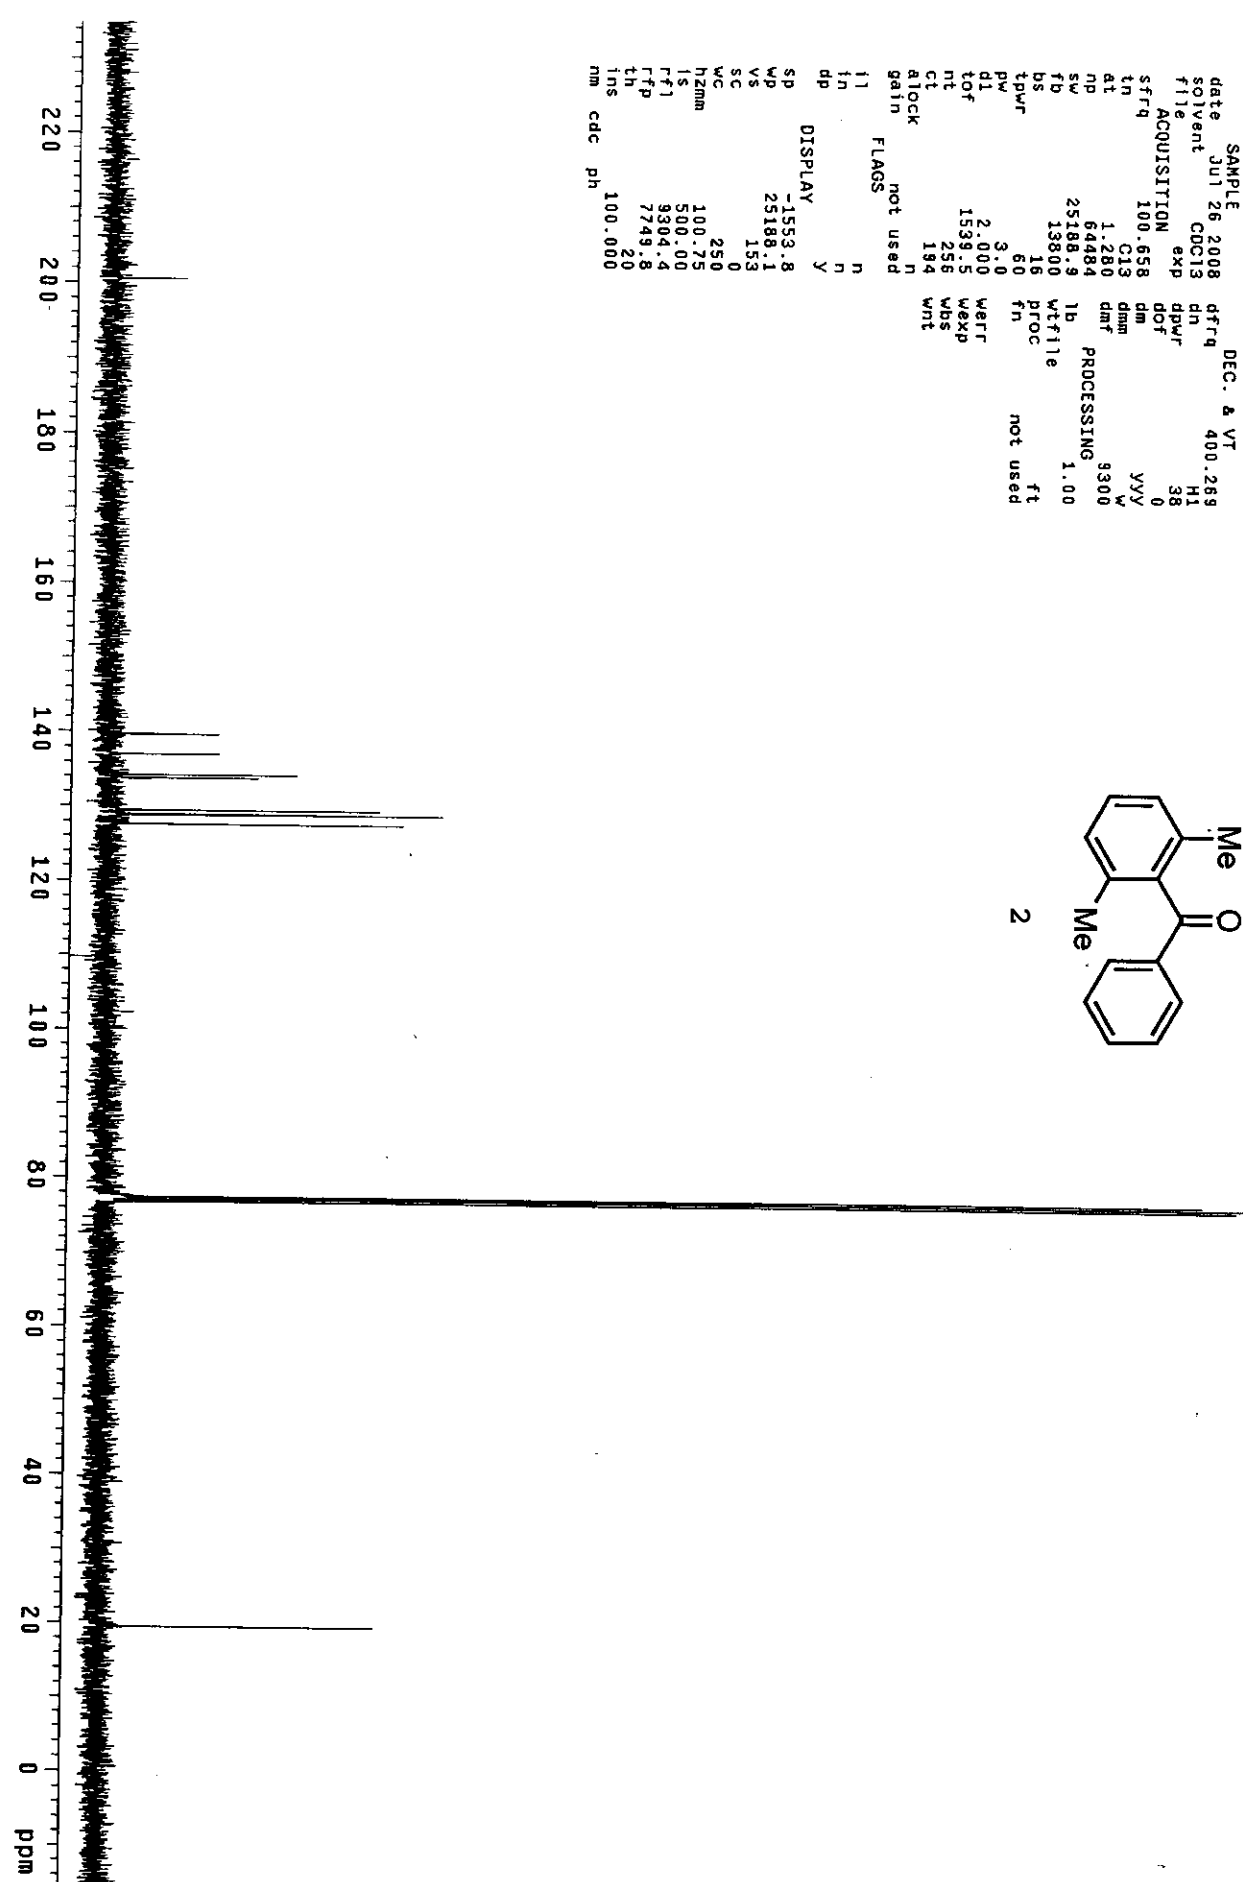

bmo-4284-1

exptl \_std1h

|         |             |            |          |
|---------|-------------|------------|----------|
| date    | Mar 3 2008  | DEC. 8 VT  | 400.269  |
| solvent | CDCl3       | dn         | H1       |
| file    | ACQUISITION | exp        | 0        |
| sfrq    | 400.269     | doz        | 30       |
| tn      | H1          | dmm        | nmn      |
| at      | 2.856       | dmf        | c        |
| np      | 32000       | PROCESSING | 200      |
| sw      | 5802.2      | lb         | 0.10     |
| fb      | not used    | wtfile     | ft       |
| bs      | 1           | proc       | not used |
| tpwr    | 58          | fn         |          |
| pw      | 2.0         | werr       |          |
| d1      | 2.000       | wexp       |          |
| tof     | 169.9       | wbs        |          |
| nt      | 16          | wnt        |          |
| ct      | 16          |            |          |
| atlock  | 16          |            |          |
| gain    | not used    |            |          |
| flags   | not used    |            |          |
| f1      | n           |            |          |
| f2      | n           |            |          |
| dp      | y           |            |          |
| DISPLAY |             |            |          |
| sp      | -621.2      |            |          |
| wp      | 5601.9      |            |          |
| vs      | 151         |            |          |
| sc      | 151         |            |          |
| wc      | 250         |            |          |
| hzmm    | 3.74        |            |          |
| fs      | 308.60      |            |          |
| rfl     | 621.6       |            |          |
| rffp    | 0           |            |          |
| th      | 20          |            |          |
| ins     | 6.000       |            |          |
| nm      | cdc         | ph         |          |

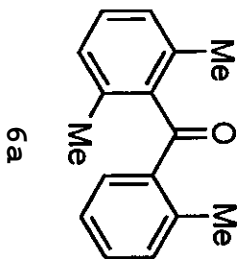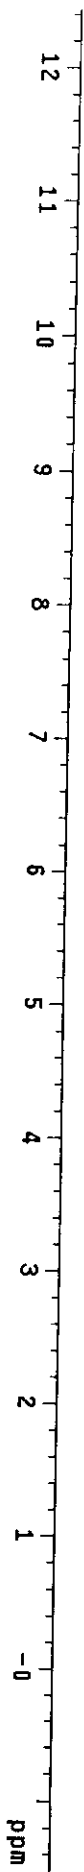

bmo4284

expt1 Carbon

```
SAMPLE 3 2008 temp 27.0
date Mar cdc13 gain 30
solvent cdc13 path 20
file /export/home/~ hst 0.008
space/data/martin_ hst 9.700
bmo4284_scpul_C13_~ pw90 10.000
ACQUISITION f1d a1fa
SW 24509.8 11
at 1.300 1n
np 63750 dp
fb 17000 hs
bs 64 1b
d1 2.000 1b
m1 256 1n
ct TRANSMITTER 256 DISPLAY not used
tn C13 sp -1737.5
sfrq 100.542 wf 24509.1
tof 1042.7 rfp 9479.1
tpwr 54 fp 7740.9
pw 3.233 1p -195.0
DECOUPLER H1 WC PLOT 250
dn 0 SC 0
dof 0 VS 0
dm YYY 1851.1
dmm W th
dpwr 43 at cdc ph 3
dmf 9000
```

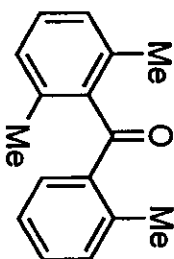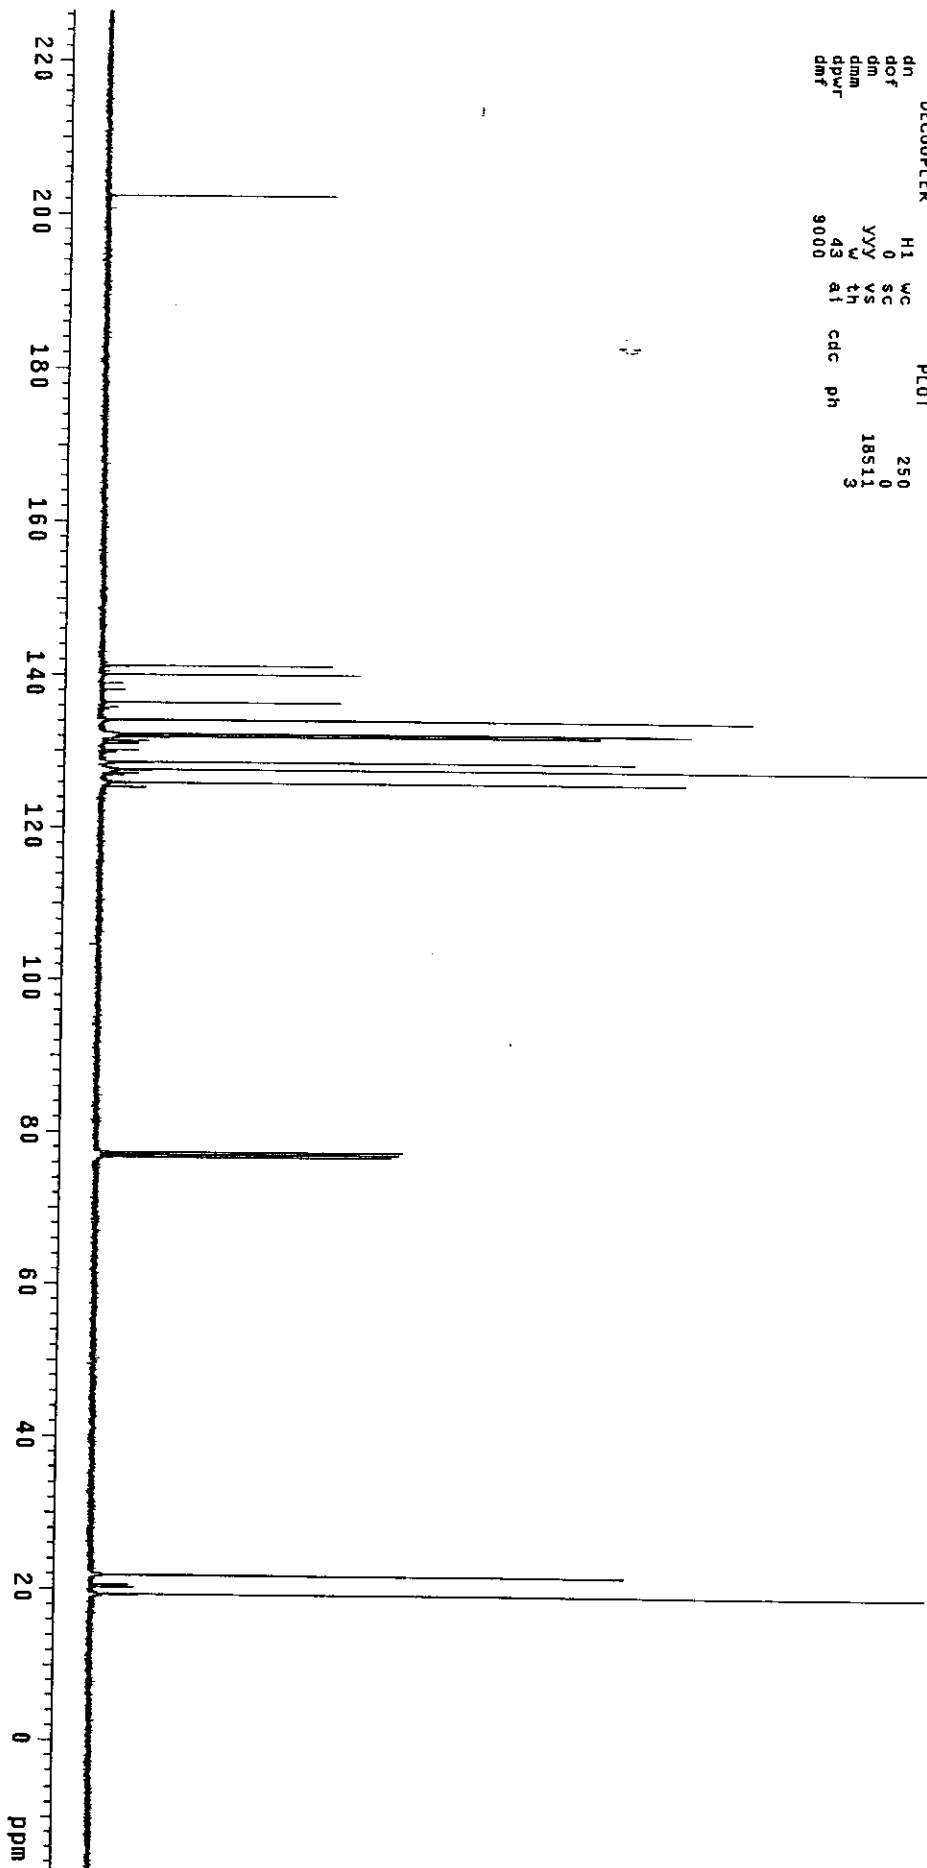

bmo-4272--3 F2

expt std1h

|         |             |             |            |          |
|---------|-------------|-------------|------------|----------|
| SAMPLE  | date        | Feb 21 2008 | DEC. & VT  | 400.269  |
| solvent | CDCl3       |             |            |          |
| file    | ACQUISITION | exp         | H1         | 30       |
| sfrq    | 400.269     |             | dm         | 0        |
| in      | H1          |             | dmm        | mmn      |
| at      | 2.856       |             | dmf        | c        |
| np      | 32000       |             | PROCESSING | 200      |
| sw      | 5602.2      |             | lb         | 0.10     |
| fb      | not used    |             | wtfile     |          |
| bs      | not used    |             | fn         | not used |
| lpwr    | 58          |             | PROC       | ft       |
| pw      | 2.0         |             | WERR       |          |
| d1      | 2.000       |             | waxp       |          |
| tof     | 189.9       |             | wbs        |          |
| nt      | 16          |             | wnt        |          |
| ct      | 16          |             |            |          |
| alock   | n           |             |            |          |
| gain    | not used    |             |            |          |
| flags   | not used    |             |            |          |
| 11      | n           |             |            |          |
| in      | n           |             |            |          |
| dp      | y           |             |            |          |
| DISPLAY |             |             |            |          |
| sp      | -621.2      |             |            |          |
| wp      | 5601.9      |             |            |          |
| vs      | 151         |             |            |          |
| sc      | 0           |             |            |          |
| wc      | 250         |             |            |          |
| hzmm    | 2.28        |             |            |          |
| ls      | 287.80      |             |            |          |
| rfl     | 3519.5      |             |            |          |
| rtp     | 2897.9      |             |            |          |
| th      | 6           |             |            |          |
| ins     | 6.000       |             |            |          |
| nm      | cdc         |             |            |          |
| ph      |             |             |            |          |

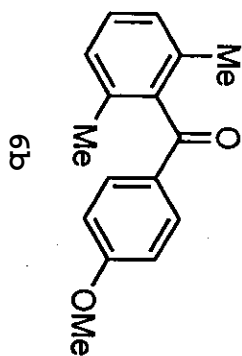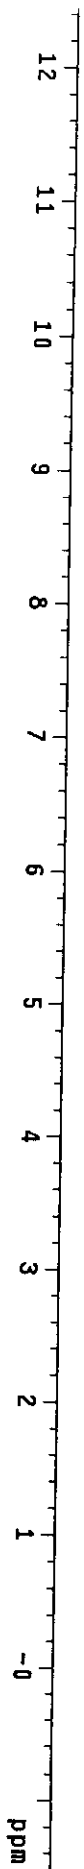

bm04272\_F2  
expt1 Carbon

SAMPLE 27.0  
date Feb 21 2008 temp  
solvent cdc13 gain 30  
file /export/home/~ sp in 20  
space/data/martin/~ hst 0.008  
bm04272\_F2\_s2pul1\_C- pw90 9.700  
13.fid a1fa 10.000  
ACQUISITION  
SW 24509.8 11  
at 1.300 in n  
np 63750 dp y  
fb 17000 hs y  
bs 64 lb nm  
d1 2.000 fb 1.00  
nt 256 fn not used  
ct TRANSMITTER 256 DISPLAY  
in C13 SP -1736.0  
stfq 100.542 WP 24509.1  
tof 1042.7 rfp 9477.7  
tpwr 54 rfp 7740.6  
pw 3.233 lp 179.1  
DECOUPLER H1 WC PLOT -134.3  
dn H1 WC 250  
dof 0 SC 0  
dm 0 VS 20470  
dmm YYY V 3  
dpwr 43 aj cdc ph  
dmf 9000

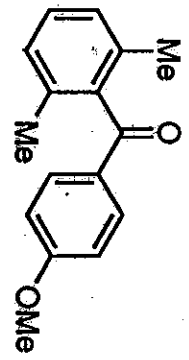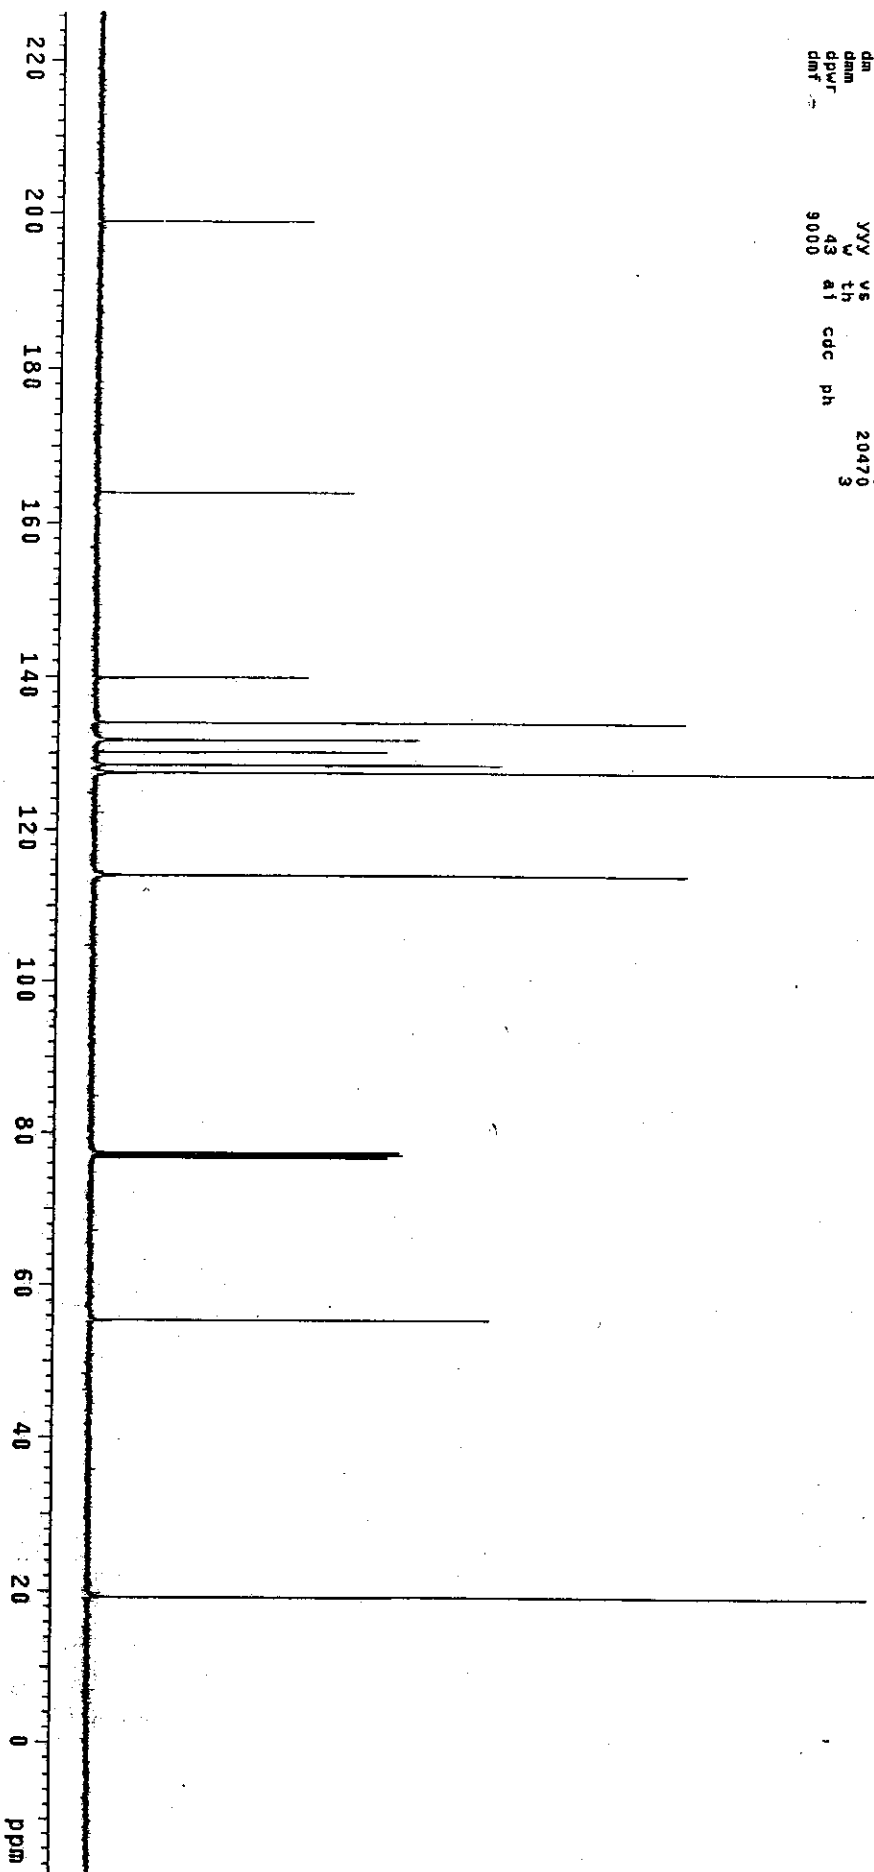

bmo-4278-3 F2

expi std1h

```
SAMPLE DEC. & VT
date Feb 26 2008 dfrq 400.269
solvent CDCl3 dn H1
file ACQUISITION exp H1
ACQUISITION 400.269 dm 30
sfreq 400.269 dm 0
tn H1 dnm mn 0
at 2.856 dnt c 200
np 32000 PROCESSING 0.10
sw 5602.2 lb wifile ft
fb not used 1 proc not used
bs 58 fn
tpwr 2.0 warr
pw 2.000 wexp
di 189.3 wds
tof 16 wnt
nt 16
ct 16
atlock not used
gain not used
flags not used
il n
in n
dp y
DISPLAY
SP -819.2
WP 5801.9
VS 175
SC 0
WC 250
hzm 3.37
ls 227.22
rfl 619.5
rfp 0
th 9
ins 6.000
nm cdc ph
```

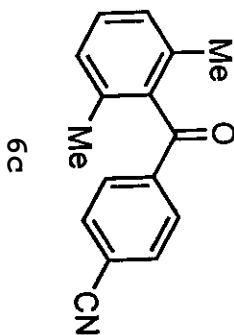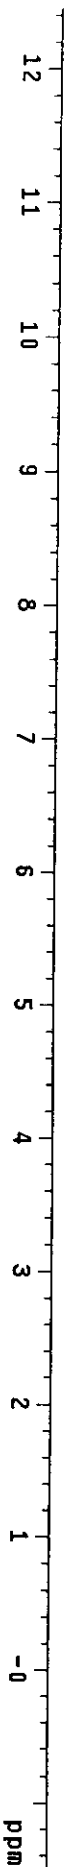



bmo4278f2

expi Carbon

|                     |                |      |        |
|---------------------|----------------|------|--------|
| date                | Feb 26 2008    | temp | 27.0   |
| solvent             | cdcl3          | gain | 30     |
| file                | /export/home/~ | sp1n | 20     |
| space/data/martin   | hst            | hst  | 0.008  |
| bmo4278f2_s2pul1.C1 | pw90           | pw90 | 9.700  |
| 3.Fid               | alfa           | alfa | 10.000 |

  

|             |         |         |          |
|-------------|---------|---------|----------|
| ACQUISITION | 24509.8 | 11      | n        |
| at          | 1300    | in      | n        |
| np          | 63750   | dp      | y        |
| fb          | 17000   | hs      | nm       |
| bs          | 84      | lb      | 1.00     |
| d1          | 2.000   | fn      | not used |
| nt          | 256     | sp      | not used |
| ct          | 256     | display | not used |

  

|             |         |     |         |
|-------------|---------|-----|---------|
| TRANSMITTER | C13     | sp  | -1732.3 |
| tn          | 100.542 | wd  | 24509.1 |
| sfreq       | 1042.7  | rf1 | 9473.9  |
| lof         | 34      | rfp | 7740.9  |
| tpwr        | 3.233   | tp  | -107.0  |
| pw          |         | lp  | -181.8  |

  

|           |      |    |       |
|-----------|------|----|-------|
| DECOUPLER | H1   | WC | 250   |
| dn        | 0    | sc | 0     |
| dof       | 0    | vs | 0     |
| dm        | YYY  | th | 25388 |
| dmm       | 43   | at | cdc   |
| dpwr      | 9000 | ph | 4     |

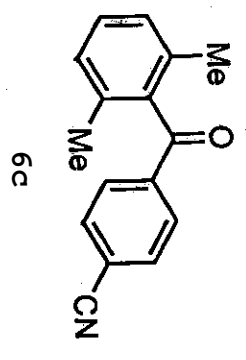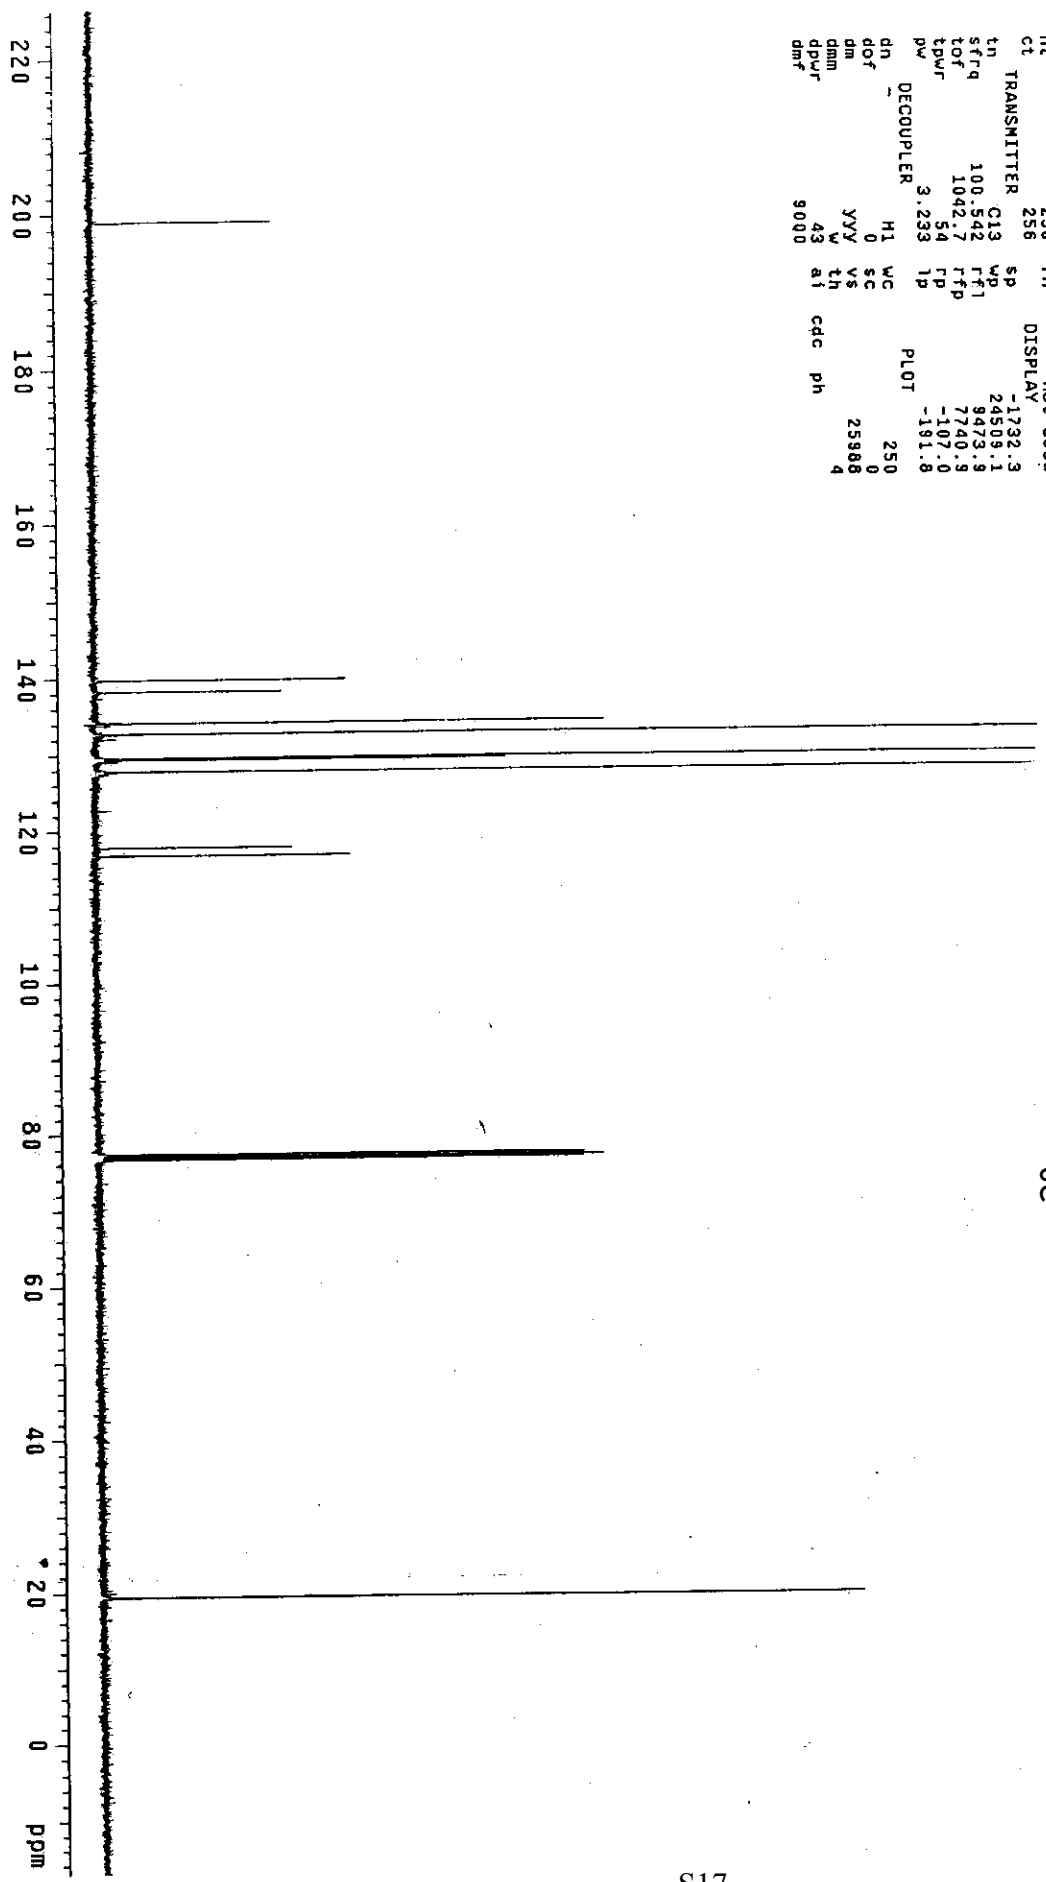

bmo4271\_f2

expi Proton

|                     |                |      |          |
|---------------------|----------------|------|----------|
| SAMPLE              | Feb 20 2008    | temp | 27.0     |
| solvent             | cdcl3          | gain | not used |
| file                | /export/home/~ | spin | 20       |
| space/data/martin/~ | ht             | pw90 | 0.008    |
| bmo4271_f2_s2pu1    | H~             | atfa | 13.800   |
| 1.ftd               |                |      | 6.600    |

  

|             |        |    |       |
|-------------|--------|----|-------|
| ACQUISITION | 6410.3 | 11 | n     |
| at          | 4.049  | in | n     |
| np          | 51506  | dp | y     |
| fb          | 4000   | hs | nr    |
| bs          | 32     | 1b | 0.10  |
| ss          | 2.000  | fn | 55536 |
| d1          | 16     |    |       |
| nt          | 16     |    |       |
| ct          | 16     |    |       |

  

|             |         |     |        |
|-------------|---------|-----|--------|
| TRANSMITTER | H1      | SP  | -606.1 |
| tn          |         | WD  | 6410.1 |
| strq        | 399.807 | FT1 | 806.3  |
| tot         | 399.5   | FP  | -27.3  |
| tpwr        | 61      | TP  | -27.0  |
| pw          | 4.600   |     |        |

  

|           |       |    |     |
|-----------|-------|----|-----|
| DECOUPLER | C13   | WC | 250 |
| dn        |       | SC | .0  |
| dof       | 0     | VS | 271 |
| dm        | nmn   | th | 50  |
| dmm       | C     | at | cdc |
| dpwr      | 34    | ph |     |
| dmt       | 29412 |    |     |

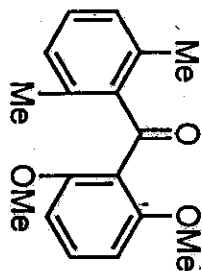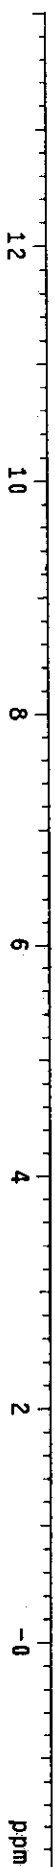

bmo4271

expt1 Carbon

```
SAMPLE          SPECIAL
date    Feb 20 2008    temp    27.0
solvent cdc13          gain    30
file    /cdrom/080303~ spin    20
      _0848/MKR080/autor~ hst    0.008
      _2008_02_20/martin~ pw90    9.700
      _bmo4271_f2_s2pul1~ a1fa    10.000
      02.fid          FLAGS
ACQUISITION     11          n
sw    24509.8         in    n
at    1.300          dp    y
np    63750          hs    nm
fd    17000          hs    nm
bs    64            lb    1.00
d1    2.000         fh    not used
nt    256           sp    DISPLAY
ct    TRANSMITTER 256     -1739.8
      C13          wp    24509.1
      100.542     rff1   9481.4
      1042.7     rfp    7740.9
      54         fp     175.0
      54         tp     -195.9
pw    3.233         tp
      DECOUPLER   H1      WC    250
      H1         SC     0
      0         VS     21341
dm    YYY         th     3
dmm  W           ai    cdc  ph
dpwr 43
dmf  9000
```

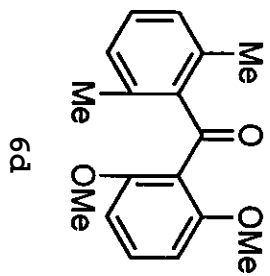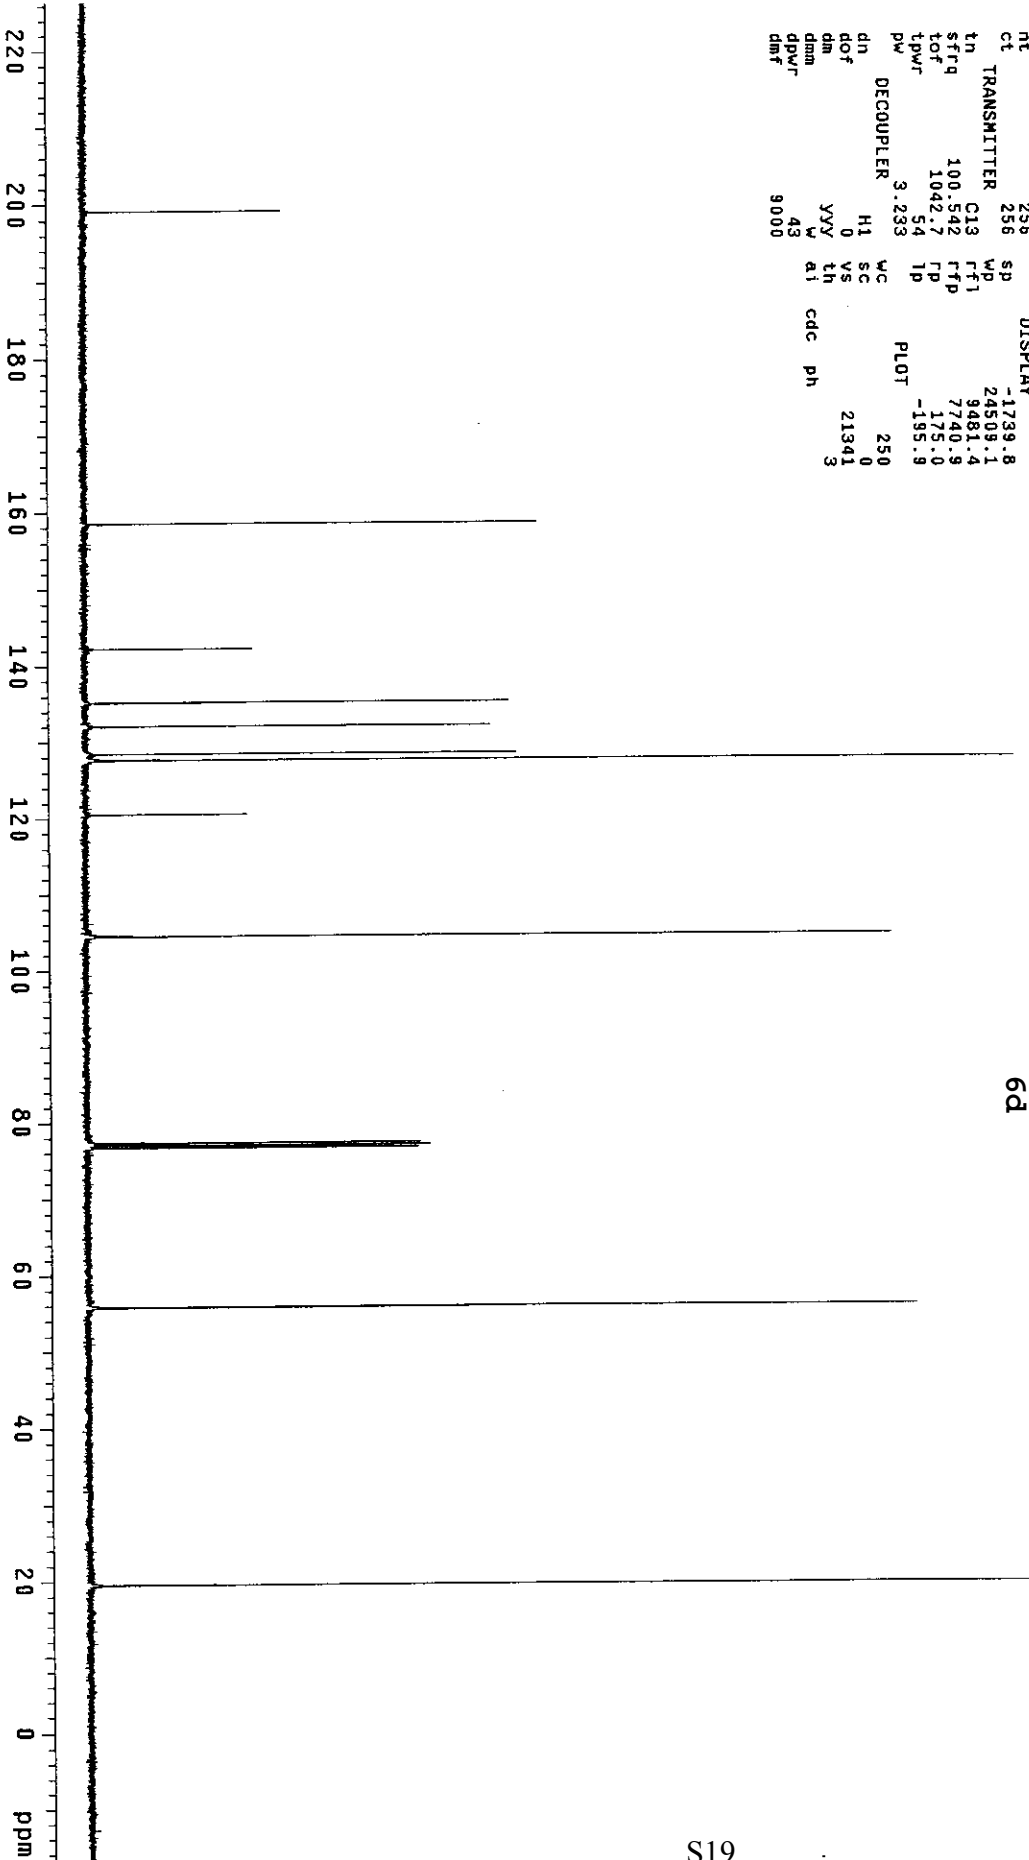

bmo5152f3

expt1 Proton

|                   |                |      |          |
|-------------------|----------------|------|----------|
| date              | Jun 2 2008     | temp | 27.0     |
| solvent           | cdcl3          | gain | not used |
| file              | /export/home/~ | spin | 20       |
| space/data/martin | ~              | hst  | 0.008    |
| bmo5152f3_scpul   | HI             | pw90 | 13.800   |
| ACQUISITION       | .fid           | dtfa | 6.600    |
| sw                | 6410.3         | 11   | n        |
| at                | 4.049          | 1n   | n        |
| np                | 51906          | dp   | y        |
| fb                | 4000           | hs   | nm       |
| bs                | 32             | 2    | 1b       |
| ss                | 2              | 1b   | fn       |
| dl                | 2.000          | fn   | 65536    |
| nt                | 16             | 16   | SP       |
| ct                | 16             | 16   | WD       |
| TRANSMITTER       | H1             | rfl  | 6410.1   |
| sfreq             | 399.807        | rffp | 3706.7   |
| tof               | 399.5          | fp   | 2894.6   |
| tpwr              | 61             | 1p   | 148.2    |
| pw                | 2.300          | 1p   | -21.5    |
| DECOUPLER         | C13            | wc   | 250      |
| dn                | 0              | vs   | 0        |
| nof               | 0              | th   | 53       |
| dm                | nm             | at   | 13       |
| dmm               | nm             | at   | 13       |
| dpwr              | 34             | at   | 13       |
| dmf               | 29412          | at   | 13       |

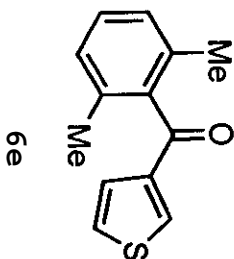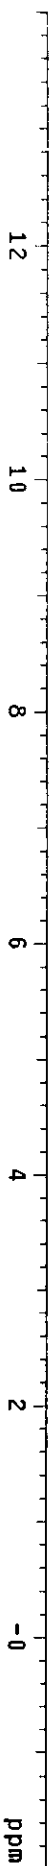

bm05152f3

expt Carbon

```
SAMPLE          SPECIAL
date Jun 2 2008 temp 27.0
solvent cdcl3 gain 30
file /export/home/~ spin 20
space/data/martin/~ hst 0.008
bm05152f3_1s2pu1.ct~ pw90 9.700
3.f1d a1fa 10.000
ACQUISITION          FLAGS
sw 24509.8 i1 n
at 1.300 in n
np 63750 dp y
fb 17000 hs nn
bs 64
dl 2.000 lb
nt 256 fn not used
ct 258 DISPLAY 1.00
TRANSMITTER          DISPLAY
tn C13 sp -1725.5
sfrq 100.542 wp 24509.1
tof 1042.7 rfp 9467.2
tpwr 54 fp 7740.9
pw 1.617 lp -29.3
DECOUPLER H1 WC PLOT -87.6
dn 0 SC 250
dof 0 SC 0
dm YYY VS 88525
dmm W TH 12
dpwr 43 ai cdc ph
dmf 9000
```

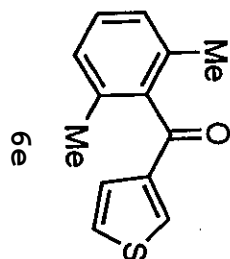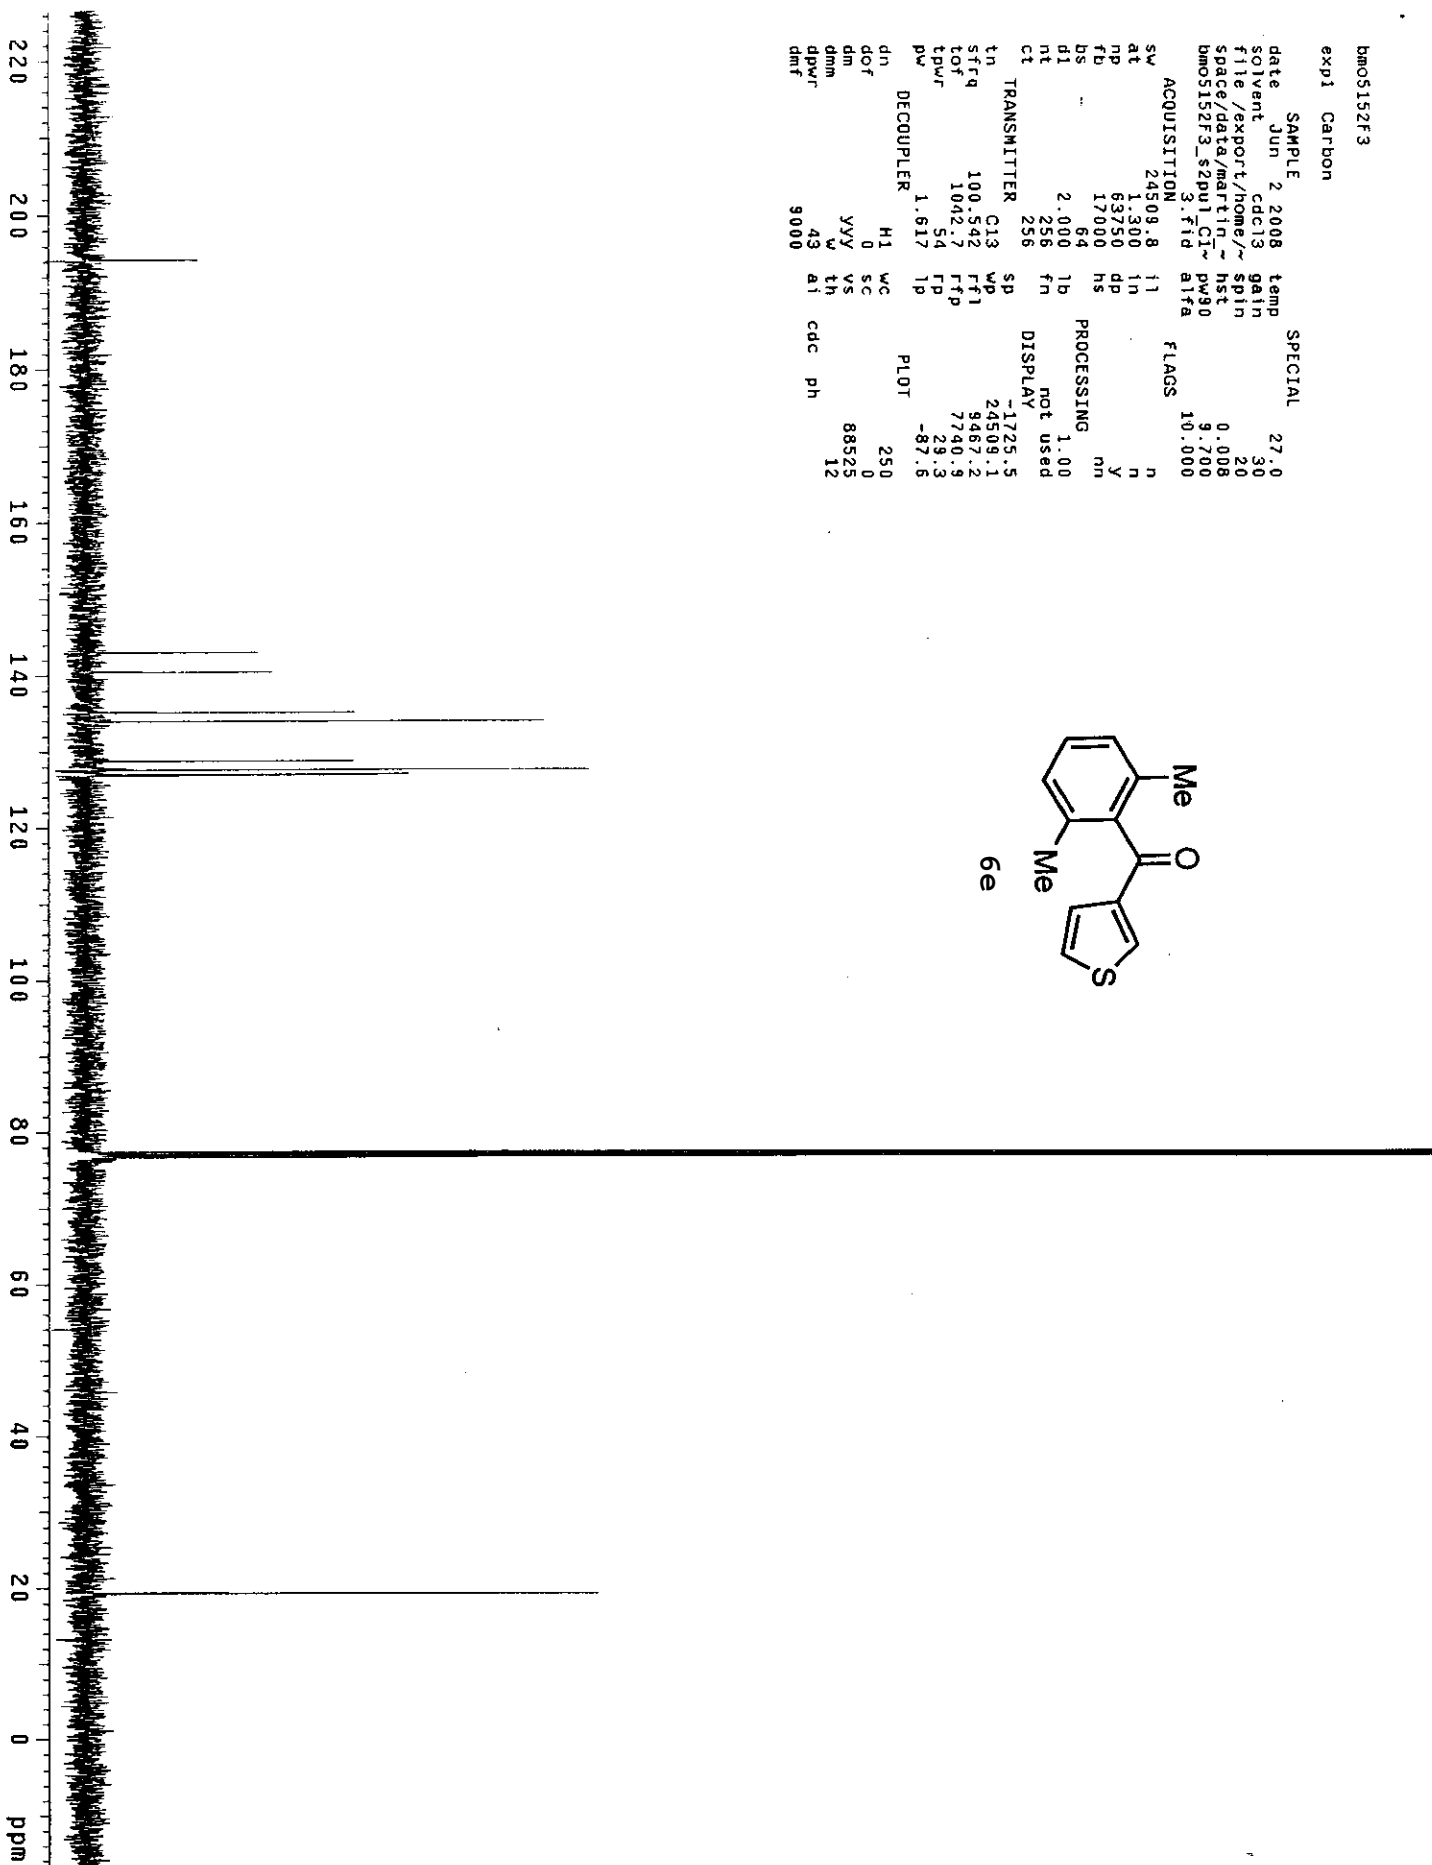

bmo\_5178\_4 F3

exp1 std1h

|             |         |             |            |       |          |
|-------------|---------|-------------|------------|-------|----------|
| SAMPLE      | date    | Jun 15 2008 | DEC. & VT  | dfreq | 400.269  |
|             | solvent | CDCl3       |            | dn    | H1       |
|             | file    | exp         |            | dpwr  | 30       |
| ACQUISITION | sfrq    | 400.269     |            | dof   | 0        |
|             | tn      | H1          |            | dmm   | nmn      |
|             | at      | 2.856       |            | dmf   | c        |
|             | np      | 32000       | PROCESSING |       | 200      |
|             | sw      | 5802.2      | lb         | 0.10  |          |
|             | fb      | not used    | wtf11e     |       |          |
|             | bs      | 1           | fn         |       | ft       |
|             | tpwr    | 58          | proc       |       | not used |
|             | pw      | 2.0         |            |       |          |
|             | d1      | 2.000       | werr       |       |          |
|             | tof     | 169.9       | wexp       |       |          |
|             | nt      | 16          | wbs        |       |          |
|             | ct      | 16          | wnt        |       |          |
| alock       |         | n           |            |       |          |
| gain        | FLAGS   | not used    |            |       |          |
| l1          |         | n           |            |       |          |
| ln          |         | n           |            |       |          |
| dp          |         | y           |            |       |          |
| DISPLAY     |         |             |            |       |          |
| sp          |         | -821.6      |            |       |          |
| wp          |         | 5801.9      |            |       |          |
| vs          |         | 151         |            |       |          |
| sc          |         | 0           |            |       |          |
| wc          |         | 250         |            |       |          |
| hzmm        |         | 1.35        |            |       |          |
| ls1         |         | 274.33      |            |       |          |
| rs1         |         | 3819.9      |            |       |          |
| rfp         |         | 2897.9      |            |       |          |
| th          |         | 20          |            |       |          |
| ins         |         | 3.000       |            |       |          |
| nm          | cdc     | ph          |            |       |          |

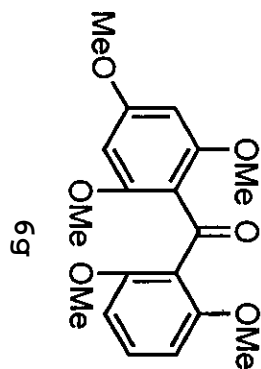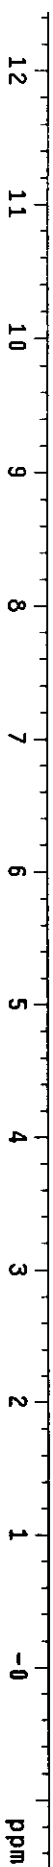

bm05178

expi std13c

```
SAMPLE      DEC. & VT
date Jun 15 2008      dfrq 400.269
solvent CDC13         dn      H1
file ACQUISITION     exp      38
                             dof      0
sfrq 100.658         dm      VVV
tn C13               dmm      W
at 1.250             dmf      9300
np 64484             PROCESsing 1.00
sw 25188.9           lb      ft
fb 13800             wtfile 1.00
bs 16                proc   not used
tpwr 3.0            fn
pw 2.000            werr
dl 1539.5           wexp
nt 1000             wds
ct 484             wnt
alock not used
gain not used
flags
ii n
in n
dp y
DISPLAY
sp -1553.8
wp 25188.1
vs 483
sc 0
wc 250
hzm 4.66
is 500.00
rfi 9304.4
rfp 7749.8
th 20
nm cdc ph 100.000
```

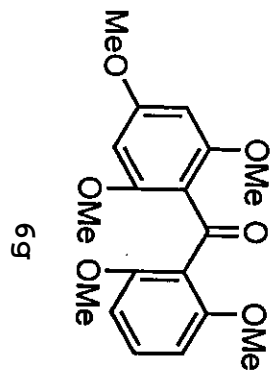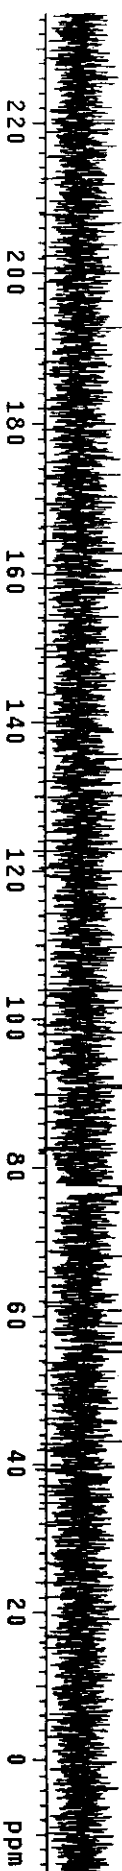

bmos181

expi Proton

```
SAMPLE          SPECIAL
date Jun 27 2008 temp 27.0
solvent cdc13 gain not used
file /mnt/home_dir/spin 20
s/pace/data/marti~ hst 0.008
n_bmos181_3_s2pul~ pv90 13.800
                  H1.fid alfa 6.600
ACQUISITION
sw 6410.3 11 n
at 4.049 1n n
np 51906 dpd y
fb 4000 hs nn
bs 32 2 1b fn
ss 2.000 1b fn
d1 2.000 1b fn
nt 16 16 DISPLAY
ct 16 sp -811.7
   TRANSMITTER H1 wp 6410.1
   sfreq 399.807 ffl 3708.5
   tot 399.5 ffp 2894.6
   tpwr 61 1p 149.2
   pw 2.300 PLOT -24.1
DECOUPLER WC 250
dn C13 sc 0
dof 0 vs 0
dm nnn th 49
dmm C at cdc ph 50
dpwr 34
dnt 28412
```

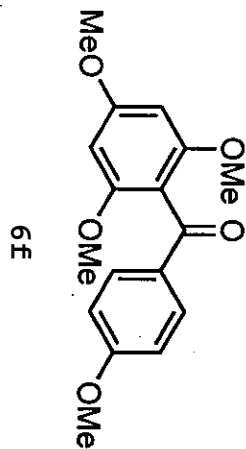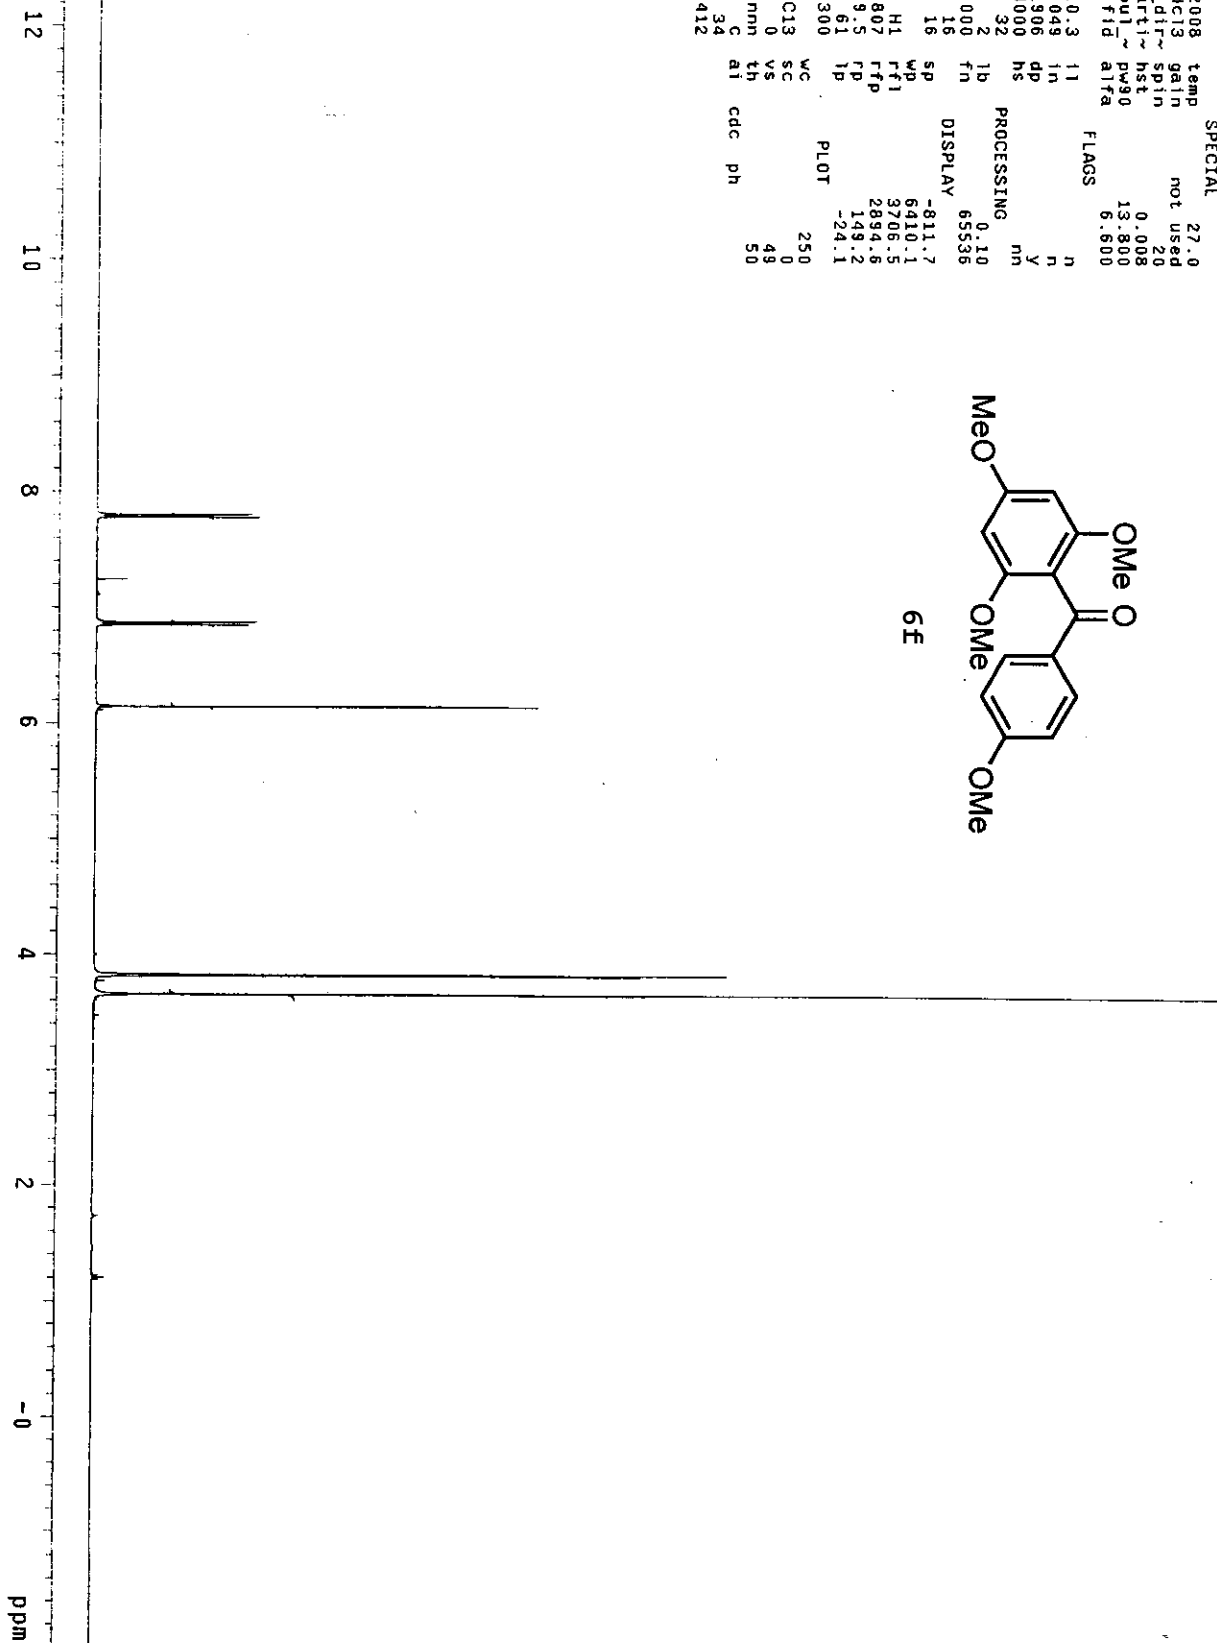



bmo5181

exptl Carbon

SAMPLE date Jun 27 2008 SPECIAL 27.0  
solvent cdc13 gain 30  
file /cdrom/080702~ sp1n 20  
\_0755/NMRROBD/autor~ hst 0.008  
\_2008.06.27/martir~ pw90 9.700  
\_bmo5181\_3\_s2pu1\_0~ a1fa 10.000  
2.f1d  
ACQUISITION 11  
sw 24509.8 in n  
at 1.300 dp y  
np 63750 hs y  
fb 17000  
bs 84 lb 1.00  
d1 2.000 fn not used  
nt 256  
ct TRANSMITTER 256 DISPLAY -1730.8  
tn C13 WP 24509.1  
sfrq 100.542 rfi 9472.4  
tof 1042.7 tpf 7740.9  
tpwr 54 tp -110.7  
pw 1.617 PLOT -178.7  
DECOUPLER WC 250  
dn H1 SC 0  
dof 0 VS 84772  
dm YYY TH 12  
dmm W al cdc ph  
dpwr 43  
dmf 9000

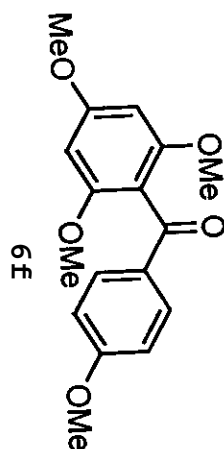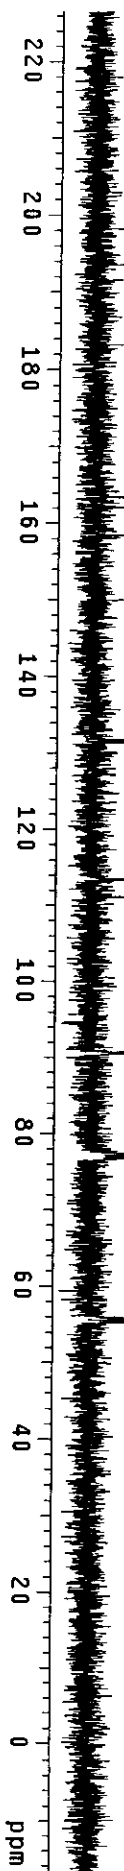

bmo-5031-4

exp1 std1h

|             |             |            |          |
|-------------|-------------|------------|----------|
| date        | Mar 27 2008 | DEC. & VT  | 400.269  |
| solvent     | CDCl3       | dn         | H1       |
| file        | exp         | dpwr       | 30       |
| ACQUISITION |             | dof        | 0        |
| sfrq        | 400.269     | dm         | nmn      |
| tn          | H1          | dmm        | C        |
| at          | 2.856       | dmf        | 200      |
| np          | 32000       | PROCESSING | 0.10     |
| sw          | 5602.2      | 1b         | ft       |
| fb          | not used    | wtfile     | not used |
| bs          | not used    | fn         |          |
| tpwr        | 58          | proc       |          |
| pw          | 2.0         | werr       |          |
| dl          | 2.000       | wexp       |          |
| tof         | 169.9       | wbs        |          |
| nt          | 16          | wnt        |          |
| ct          | 16          |            |          |
| atock       | 16          |            |          |
| gain        | not used    |            |          |
| FLAGS       |             |            |          |
| l1          | n           |            |          |
| in          | n           |            |          |
| dp          | y           |            |          |
| DISPLAY     |             |            |          |
| sp          | -820.2      |            |          |
| wp          | 5601.6      |            |          |
| vs          | 155         |            |          |
| sc          | 0           |            |          |
| WC          | 250         |            |          |
| hzmnm       | 2.63        |            |          |
| is          | 242.11      |            |          |
| rfl         | 3518.5      |            |          |
| rtp         | 2897.9      |            |          |
| th          | 20          |            |          |
| ins         | 3.000       |            |          |
| nm          | cdc         |            |          |
| ph          |             |            |          |

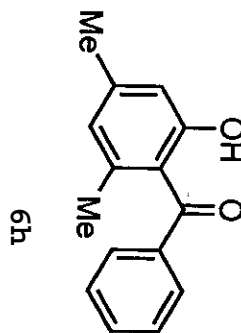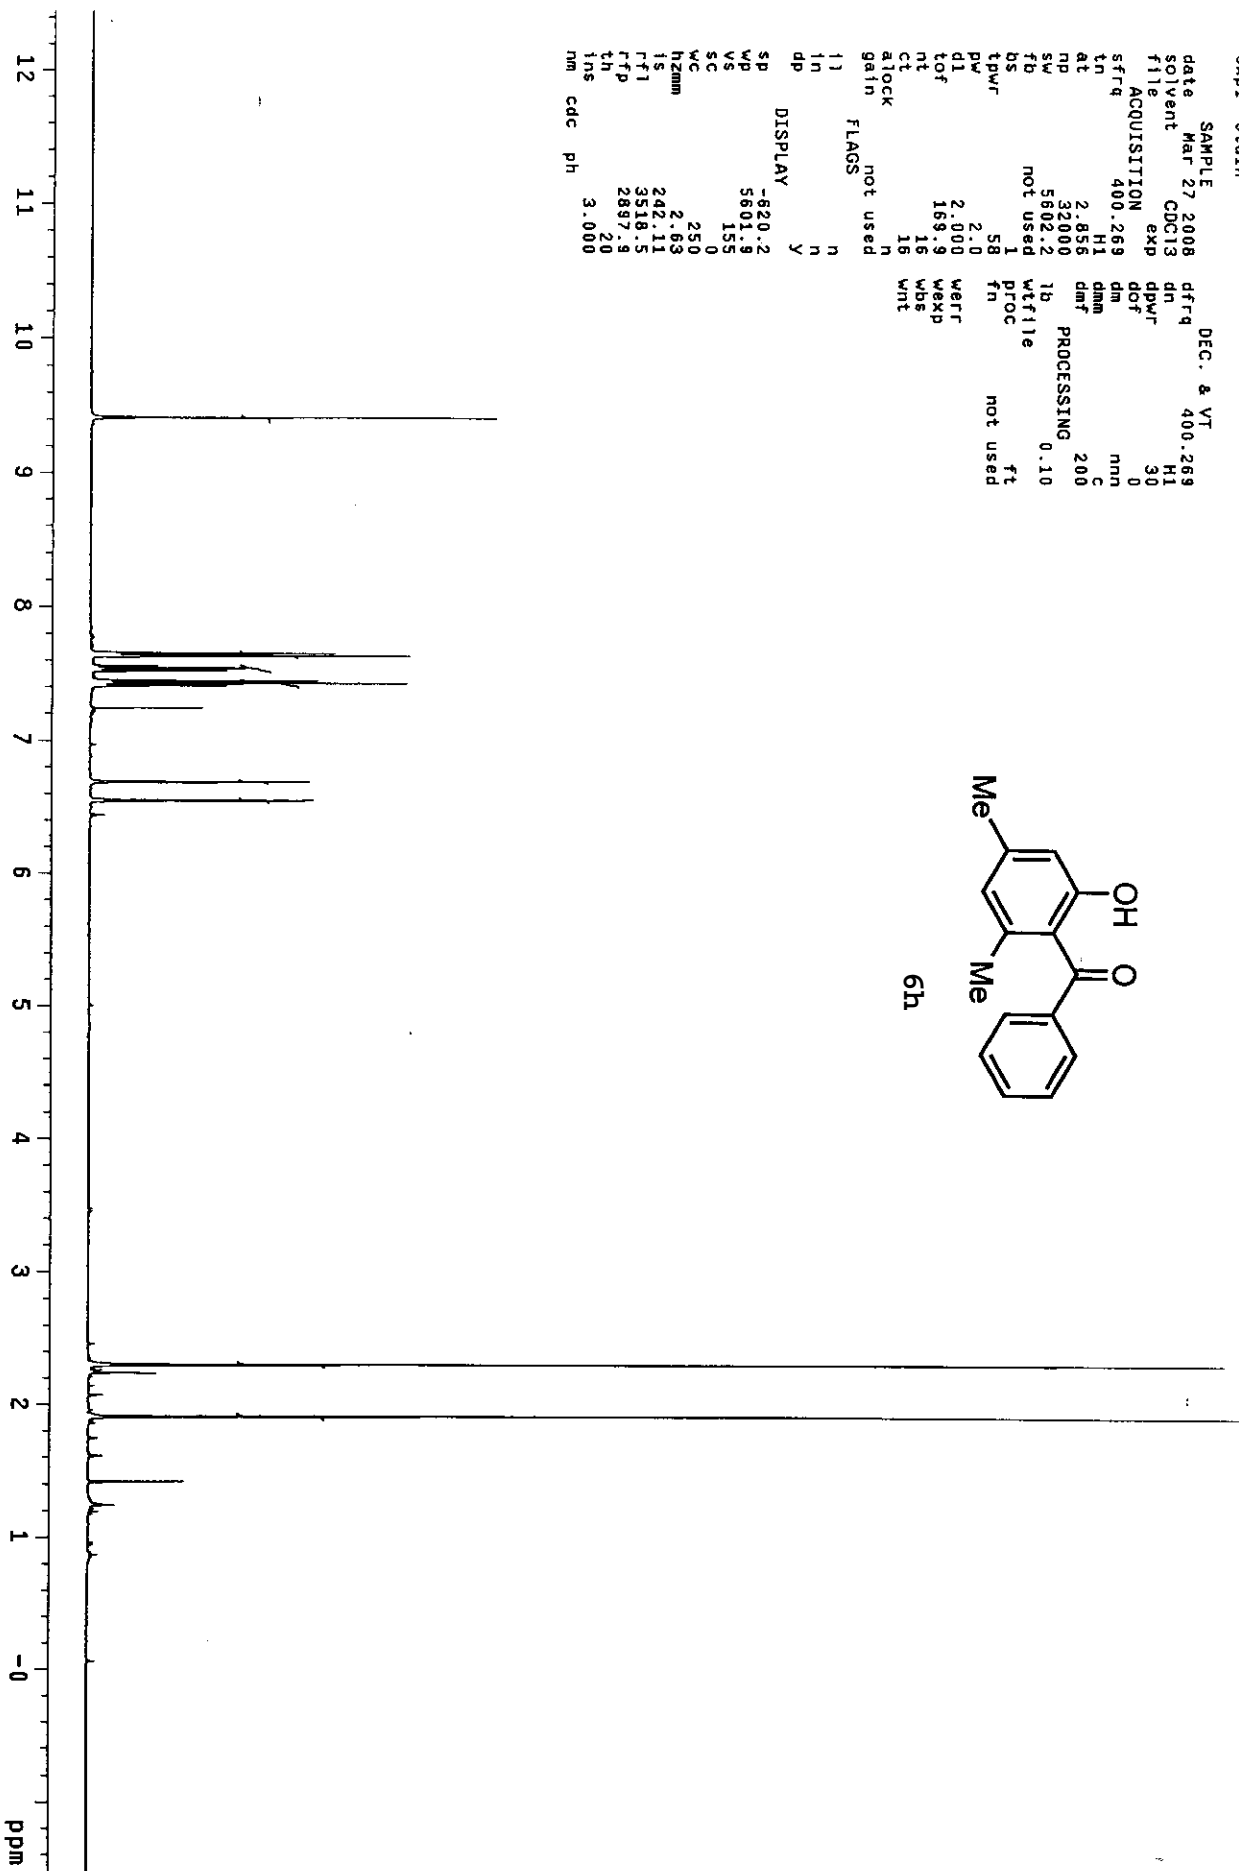

bmo5031

exp1\_std13c

|             |             |           |            |          |
|-------------|-------------|-----------|------------|----------|
| date        | Mar 27 2008 | DEC. & VT | dfrq       | 400.269  |
| solvent     | CDCl3       |           | dn         | H1       |
| file        | exp         |           | dpwr       | 38       |
| ACQUISITION |             |           | dof        | 0        |
| sfrq        | 100.658     |           | dm         | YYY      |
| tn          | C13         |           | dmm        | W        |
| at          | 1.280       |           | dmf        | 9300     |
| np          | 51484       |           | PROCESsing | 1.00     |
| sw          | 25188.3     |           | lb         | wtfile   |
| fb          | 13800       |           | proc       | not used |
| bs          | 16          |           | fn         | ft       |
| tpwr        | 3.0         |           | werr       | 2.000    |
| pw          | 2.000       |           | wexp       | 1539.5   |
| dl          | 1539.5      |           | wds        | 256      |
| tof         | 256         |           | wnt        | not used |
| nt          | 256         |           |            |          |
| ct          | 256         |           |            |          |
| atlock      | n           |           |            |          |
| gain        | not used    |           |            |          |
| fl          | FLAGS       |           |            |          |
| in          | n           |           |            |          |
| dp          | y           |           |            |          |
| DISPLAY     |             |           |            |          |
| sp          | -1553.8     |           |            |          |
| wp          | 25188.1     |           |            |          |
| vs          | 196         |           |            |          |
| sc          | 0           |           |            |          |
| wc          | 250         |           |            |          |
| hzm         | 6.25        |           |            |          |
| fs          | 500.00      |           |            |          |
| rfl         | 9304.4      |           |            |          |
| rfp         | 7749.8      |           |            |          |
| th          | 20          |           |            |          |
| ins         | 100.000     |           |            |          |
| nm          | cdc         |           |            |          |
| ph          |             |           |            |          |

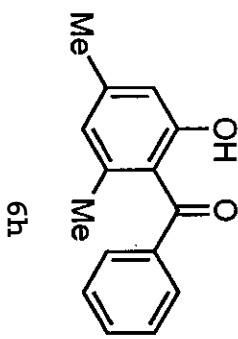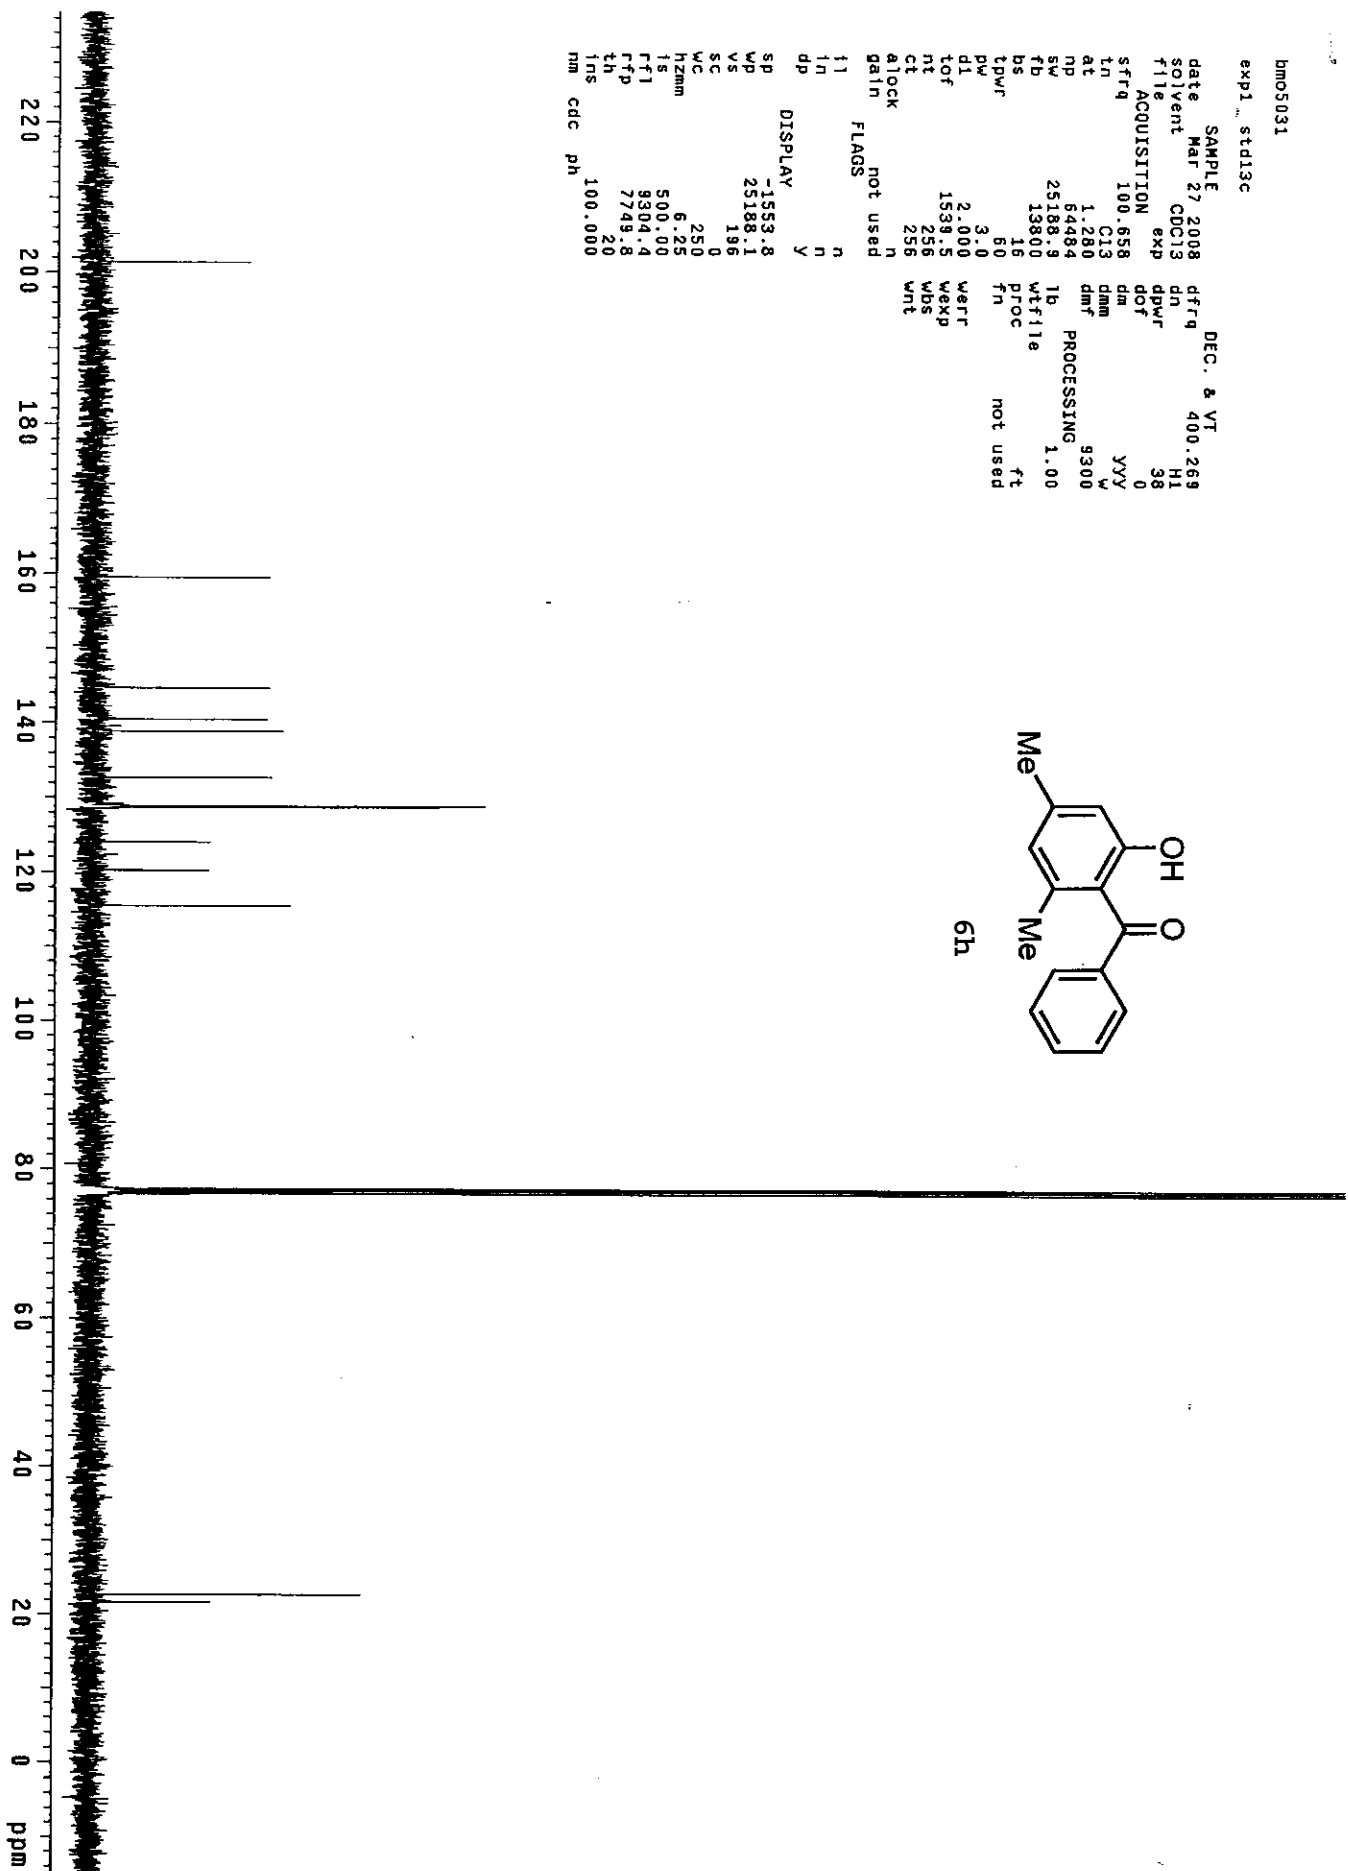

bmo\_5225\_3

expi stdih

|             |             |           |            |
|-------------|-------------|-----------|------------|
| date        | Jul 30 2008 | DEC. & VT | 400.269    |
| solvent     | CDCl3       | dn        | H1         |
| file        | exp         | dpwr      | 30         |
| ACQUISITION |             | dof       | 0          |
| sfrq        | 400.269     | dm        | nmn        |
| in          | H1          | dmm       | C          |
| at          | 2.856       | dmf       | 200        |
| np          | 32000       | lb        | PROCESSING |
| sw          | 5602.2      | wf1le     | 0.10       |
| fb          | not used    | fn        | ft         |
| bs          | 58          | proc      | not used   |
| tpwr        | 2.0         | weff      |            |
| pw          | 2.000       | wexp      |            |
| tof         | 169.9       | wbs       |            |
| nt          | 16          | wnt       |            |
| ct          | 16          |           |            |
| atlock      | n           |           |            |
| gain        | not used    |           |            |
| FLAGS       |             |           |            |
| ll          | n           |           |            |
| ln          | n           |           |            |
| dp          | y           |           |            |
| DISPLAY     |             |           |            |
| sp          | -623.0      |           |            |
| wp          | 5601.9      |           |            |
| vs          | 155         |           |            |
| sc          | 0           |           |            |
| wc          | 250         |           |            |
| hzmm        | 2.83        |           |            |
| ls          | 183.93      |           |            |
| rfl         | 3521.2      |           |            |
| rfdp        | 2897.9      |           |            |
| th          | 20          |           |            |
| ins         | 3.000       |           |            |
| nm          | cdc         | ph        |            |

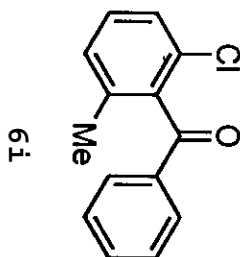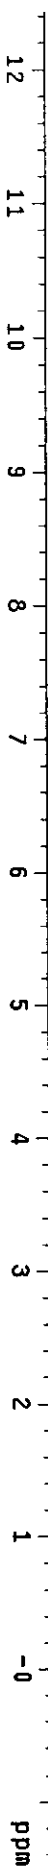

bmo\_5225\_2

expl std13c

```
SAMPLE DEC. & VT
date Jul 30 2008 dfrq 400.268
solvent CDCl3 dn H1
file ACQUISITION exp dpr 38
ACQUISITION dpr 0
sfrq 100.658 dm YYY
tn C13 dmm W
at 1.280 dmt 9300
np 64484 lb PROCESSING 1.00
sw 25188.9 wf file
fb 13800 16 proc not used
bs tpwr 60 fn
pw 3.0 werr
d1 2.000 wexp
tof 1539.5 wexp
nt 1000 wbs
ct 175 wnt
gain not used
alock n
flags not used
ll n
in n
dp y
DISPLAY
sp -1565.3
wp 25188.1
vs 144
sc 0
wc 250
hzmh 100.75
is 500.00
rfi 9315.9
rfp 7749.8
th 20
ins 100.000
nm cdc ph
```

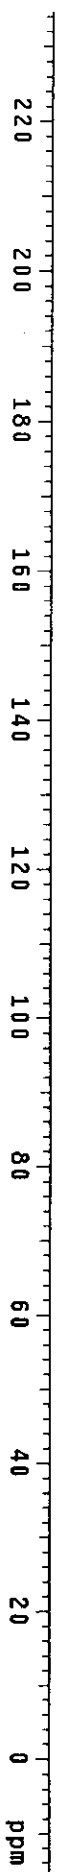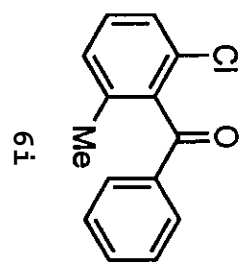

n1s\_1176\_1  
expt std1h

SAMPLE DEC. 6 VT  
date Jun 30 2008 dfrq 400.269  
solvent CDCl3 dn H1  
file exp dpwr H1  
ACQUISITION 30  
sfrq 400.270 dm dof 0  
tn H1 dmf nm C  
at 2.854 dmf 200  
np 36592 lb PROCESSING 0.10  
sw 6410.3 wifile  
fb not used  
bs 1 fn  
tpwr 58  
pw 2.0 werr not used  
d1 2.000 wexp  
tof 784.7 wps  
nt 16 wnt  
ct 16  
alock gain not used  
flags not used  
ll n  
ln n  
dp Y  
DISPLAY  
sp -410.5  
wp 6410.1  
vs 151  
sc 0  
vc 250  
hzmm 1.23  
fs 221.73  
rf1 3308.6  
rfp 2897.9  
th 20  
ins 6.000  
nm cdc ph

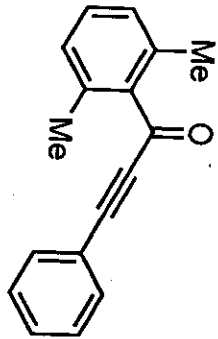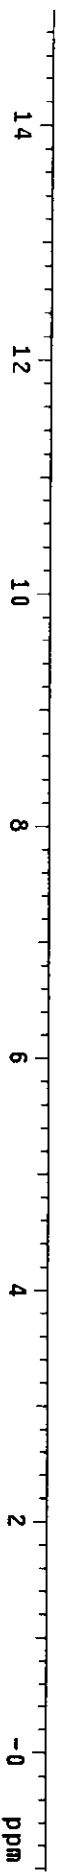

nl1176

expt Carbon

|                     |                |       |          |
|---------------------|----------------|-------|----------|
| date                | Jun 30 2008    | temp  | 27.0     |
| solvent             | cdcl3          | gain  | 30       |
| file                | /export/home/~ | spn   | 20       |
| space/data/martin/~ | hst            | 0.008 |          |
| nl1176_s2pul1_C13~  | pw90           | 9.700 |          |
|                     | fid            | alfa  | 10.000   |
|                     |                | FLAGS |          |
| ACQUISITION         | 24509.8        | 11    | n        |
| at                  | 1.300          | in    | n        |
| np                  | 63750          | dp    | y        |
| fb                  | 17000          | hs    | nn       |
| bs                  | 64             |       |          |
| d1                  | 2.000          | tb    | fn       |
| nt                  | 256            |       | not used |
| ct                  | 256            |       | DISPLAY  |
| TRANSMITTER         | C13            | SP    | -1727.0  |
| tn                  | 100.542        | WP    | 24509.1  |
| stfq                | 1042.7         | rf1   | 9468.7   |
| tof                 | 54             | rfp   | 7740.9   |
| tpwr                | 1.617          | lp    | -119.7   |
| pw                  |                |       | -163.3   |
| DECOUPLER           | H1             | WC    | 250      |
| dn                  | 0              | SC    | 0        |
| dof                 | 0              | VS    | 64779    |
| dm                  | YVY            | tn    | 13       |
| dmm                 | W              | at    | cdc      |
| dpwr                | 43             | ph    |          |
| dmt                 | 9000           |       |          |

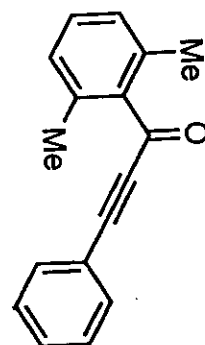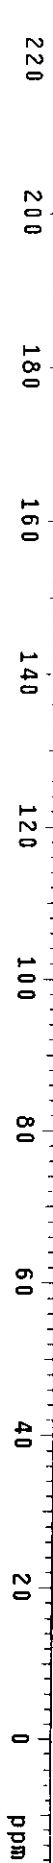

bmo\_5221\_2 F2

expt st11h

```
SAMPLE DEC. & VT
date JUL 26 2006 dfrq 400.269
solvent CDCl3 dn H1
file ACQUISITION dpwr 30
sfrq 400.269 dof 0
tn H1 dmm nmn
at 2.856 dm C
nd 32000 dmf 200
sw 5602.2 lb PROCESSING 0.10
fd not used wf file ft
bs 1 fn not used
tpwr 58 proc
pw 2.00 werr
dl 2.000 wexp
tof 169.9 wbs
nt 16 wnt
ct 15
atlock gain not used
gain flags not used
11 n
1n n
dp y
DISPLAY
sp -620.2
wd 5601.9
ve 155
sc 250
wc 1.33
hzmm 217.06
fs 3518.5
rfp 2897.9
th 20
lms cdc ph 6.000
```

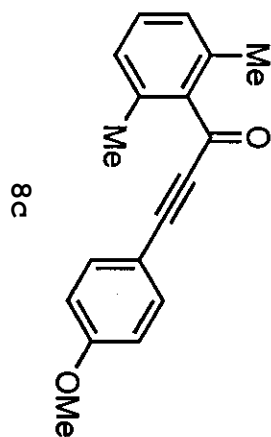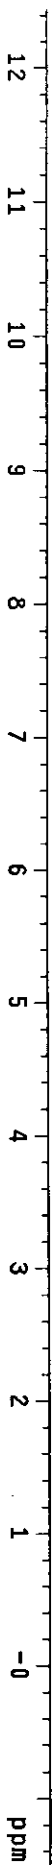



expi std13c

|             |          |             |           |         |
|-------------|----------|-------------|-----------|---------|
| SAMPLE      | date     | Jul 26 2008 | DEC. & VT | 400.268 |
| solvent     | CDCl3    |             | H1        | 38      |
| file        | exp      |             | 0         |         |
| ACQUISITION | exp      |             | 0         |         |
| sfrq        | 100.658  | dm          | yyy       | yy      |
| ln          | C13      | dmm         | yy        | yy      |
| at          | 1.280    | dmf         | 9300      |         |
| np          | 64484    | PROCESsing  | 1.00      |         |
| sw          | 25188.9  | lb          |           |         |
| fb          | 13800    | wtfile      |           |         |
| bs          | 16       | proc        |           |         |
| tpwr        | 3.0      | fn          | not used  | fi      |
| pw          | 2.000    | werr        |           |         |
| d1          | 1539.5   | wexp        |           |         |
| tof         | 1000     | wbs         |           |         |
| nt          | 401      | wnt         |           |         |
| ct          |          |             |           |         |
| atlock      | not used |             |           |         |
| gain        |          |             |           |         |
| fl          | FLAGS    |             |           |         |
| in          | n        |             |           |         |
| in          | n        |             |           |         |
| dp          | y        |             |           |         |
| DISPLAY     |          |             |           |         |
| sp          | -1554.6  |             |           |         |
| wp          | 25188.1  |             |           |         |
| vs          | 232      |             |           |         |
| sc          | 0        |             |           |         |
| wc          | 250      |             |           |         |
| hzm         | 4.66     |             |           |         |
| is          | 500.00   |             |           |         |
| rfl         | 9305.2   |             |           |         |
| rfp         | 7749.8   |             |           |         |
| th          | 20       |             |           |         |
| ins         | 100.000  |             |           |         |
| nm          | cdc      | ph          |           |         |

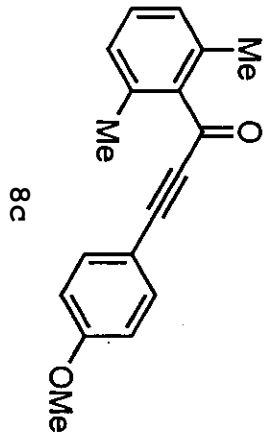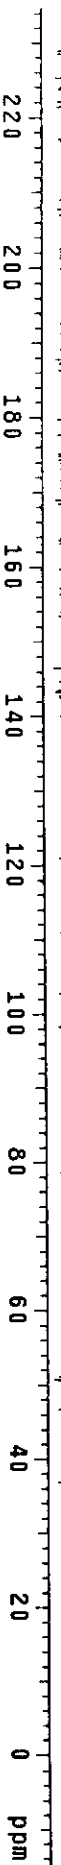

bmo-4256-2 P1

expl stdlh

|             |            |            |          |
|-------------|------------|------------|----------|
| date        | Feb 8 2008 | DEC. & VT  | 400.269  |
| solvent     | CDCl3      | dn         | H1       |
| file        | CDCl3      | dpwr       | 30       |
| ACQUISITION | exp        | dof        | 0        |
| sfreq       | 400.269    | dm         | nn       |
| tn          | H1         | dmm        | c        |
| at          | 2.856      | dmf        | 200      |
| np          | 32000      | PROCESSING | 0.10     |
| sw          | 5602.2     | lb         | wtfile   |
| fb          | not used   | proc       | ft       |
| bs          | 1          | fn         | not used |
| tpwr        | 58         | werr       |          |
| dl          | 2.0        | wexp       |          |
| tof         | 2.000      | wbs        |          |
| nt          | 169.9      | wnt        |          |
| ct          | 16         |            |          |
| atlock      | 16         |            |          |
| gain        | not used   |            |          |
| flags       | not used   |            |          |
| l1          | n          |            |          |
| l2          | n          |            |          |
| dp          | y          |            |          |

  

|      |         |        |
|------|---------|--------|
| SP   | DISPLAY | -620.9 |
| WP   |         | 5601.9 |
| VS   |         | 155    |
| SC   |         | D      |
| WC   |         | 250    |
| h2mm |         | 22.41  |
| fe   |         | 254.73 |
| ff1  |         | 3515.2 |
| ffp  |         | 2897.9 |
| tn   |         | 20     |
| lms  |         | 1.000  |
| nm   | cdc     | ph     |

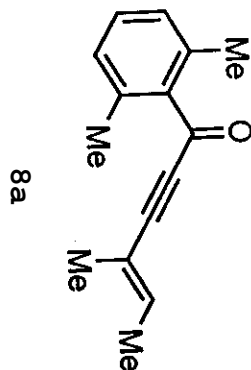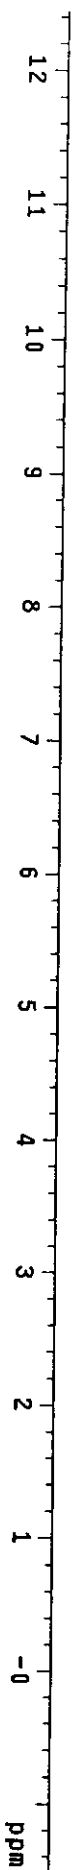

bmo4256

exh1 Carbon

```
SAMPLE 8 2008 temp 27.0
date Feb 8 2008 cdc13 gain 30
solvent space/home/~ spin not used
file /export/home/~ hst 0.005
space/data/martln_~ hst 9.700
bmo4256_s2bul_C13_~ pw90 10.000
fid alfa
```

ACQUISITION

|    |         |    |          |
|----|---------|----|----------|
| sw | 24509.8 | 11 | n        |
| at | 1.300   | in | n        |
| np | 63750   | dp | Y        |
| fb | 17000   | hs | nm       |
| bs | 84      |    |          |
| ds | 2.000   | lb | 1.00     |
| dl | 256     | fn | not used |
| nl | 256     |    |          |
| ct | 256     |    |          |

TRANSMITTER

|      |         |     |         |
|------|---------|-----|---------|
| tn   | C13     | sp  | -1723.3 |
| stfg | 100.542 | wp  | 24509.1 |
| tof  | 1042.7  | fft | 9464.9  |
| tpwr | 54      | fp  | 7740.9  |
|      |         | fp  | 161.0   |
| pw   | 3.233   | lp  | -184.5  |

DECOUPLER

|      |      |     |       |
|------|------|-----|-------|
| dn   | H1   | wc  | 250   |
| dof  | 0    | sc  | 0     |
| dm   | YYY  | vs  | 89988 |
| dmm  | w    | th  |       |
| dpwr | 43   | at  | 17    |
| dmf  | 9000 | cdc | ph    |

PLOT

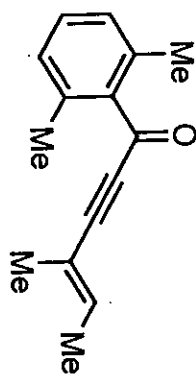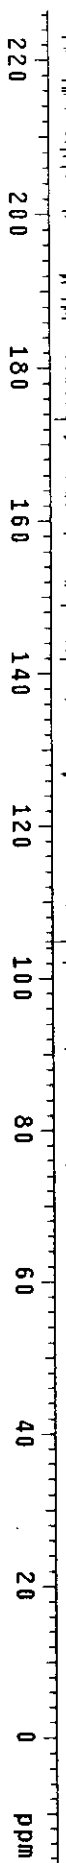

bmo5XXXX

expt1 Proton

```
SAMPLE          SPECIAL
date Sep 9 2008 temp 27.0
solvent cdcl3 gain not used
file /mnt/home_dir/~ spin 20
s/Space/data/bmo_X~ hst 0.008
XXX_methoxy_s2pu1~ pw90 14.800
                    alfa 6.600
ACQUISITION     FLAGS
SW 6410.3 11 n
at 4.049 1n n
np 51906 dp hs y
fb 4000 32 mh
bs 2 2 1b
ss 2.000 32 fn
d1 2.000 32 DISPLAY -813.7
nt 32 32 65536
ct TRANSMITTER 32 SP 6410.1
tn H1 WP 3708.5
stfq 399.807 rf1 2894.6
tof 389.5 fp 147.8
tpwr 60 1p -19.9
pw 4.933 PLOT 250
DECOUPLER WC 250
dn C13 SC 0
dof 0 VS 254
dm 0 th 40
dmm C at
dpwr 34 cdc ph
dmf 29412
```

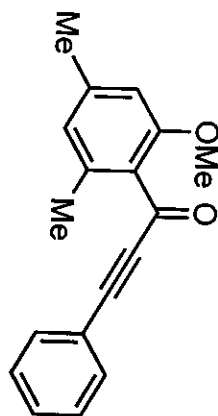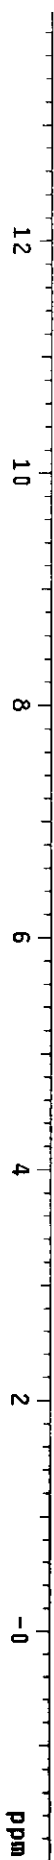

bmosXXX

expt1 Carbon

|                   |                   |         |          |
|-------------------|-------------------|---------|----------|
| date              | Sep 9 2008        | temp    | 27.0     |
| solvent           | cdcl3             | gain    | 30       |
| file              | /mnt/home-dlr/~   | spin    | 20       |
| s/                | space/data/bmo_X~ | hst     | 0.008    |
| XXX_methoxy_s2pul | ~                 | pw90    | 9.700    |
| C13-fid           | alfa              | 10.000  |          |
| ACQUISITION       |                   | FLAGS   |          |
| SW                | 24509.8           | 11      | n        |
| at                | 1.300             | in      | n        |
| np                | 63750             | dp      | y        |
| fb                | 17000             | hs      | nm       |
| bs                | 64                |         |          |
| d1                | 2.000             | 1b      | not used |
| nt                | 256               | fn      | 1.00     |
| ct                | 256               | DISPLAY |          |
| TRANSMITTER       | C13               | SP      | -1729.3  |
| tn                | 100.542           | WP      | 24509.1  |
| sfreq             | 1042.7            | FT1     | 9470.9   |
| tof               | 54                | FP      | -139.7   |
| tpwr              | 3.233             | 1p      | -176.2   |
| DECOUPLER         | H1                | WC      | 250      |
| dn                | 0                 | SC      | 0        |
| dof               | 0                 | VS      | 32514    |
| din               | YY                | th      | 4        |
| dmm               | W                 | at      | cdc      |
| dpwr              | 44                | ph      |          |
| dmt               | 10200             |         |          |

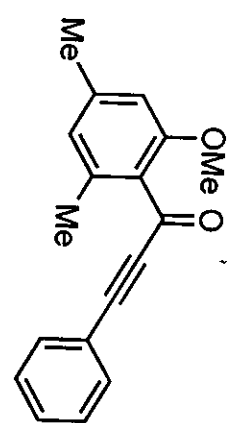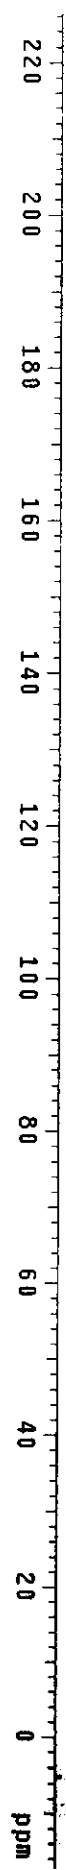

n1s1183

expt1 Proton

|         |             |                             |       |          |
|---------|-------------|-----------------------------|-------|----------|
| SAMPLE  | date        | Sep 12 2008                 | temp  | 27.0     |
| SPECIAL | solvent     | cdcl3                       | gain  | not used |
|         | file        | /mnt/home/dfi-<br>s/        | spin  | 0.008    |
|         | s/          | space/data/n1s11-<br>83s2p1 | ns1   | 14.800   |
|         | ACQUISITION | 6410.3                      | alpha | 6.600    |
|         | sw          | 6410.3                      | flags |          |
|         | at          | 4.049                       | 11    | n        |
|         | np          | 51906                       | in    | n        |
|         | fb          | 4000                        | dp    | y        |
|         | bs          | 32                          | hs    | nm       |
|         | ss          | 2                           |       |          |
|         | di          | 2.000                       | 1b    | nm       |
|         | di          | 16                          | fn    | 0.10     |
|         | ct          | 16                          |       | 65538    |
|         | TRANSMITTER | H1                          | sp    | -813.5   |
|         | ln          | 399.807                     | wp    | 6410.1   |
|         | stf         | 399.5                       | rf1   | 3708.3   |
|         | tof         | 60                          | rfp   | 2894.6   |
|         | lpwr        | 4.933                       | 1p    | -119.9   |
|         | PW          |                             |       | -27.5    |
|         | DECOUPLER   | C13                         | WC    | 250      |
|         | dn          | 0                           | sc    | 0        |
|         | dof         | nmn                         | vs    | 113      |
|         | dm          | C                           | th    | 40       |
|         | dmm         | 34                          | ai    | cdc      |
|         | dpwr        | 29412                       | ph    |          |
|         | dmf         |                             |       |          |

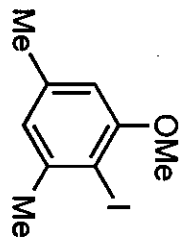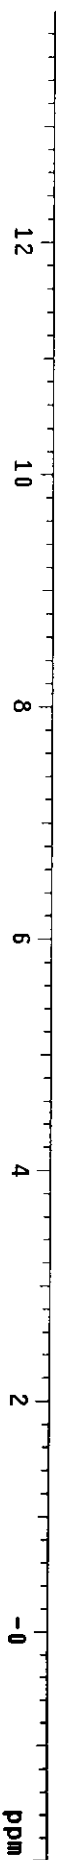

nlsl183

exptl Carbon

SAMPLE Sep 12 2008 SPECIAL 27.0  
 solvent cdc13 gain 30  
 file /mnt/home\_dir spin 20  
 s/pace/data/nlsl183 hst 0.008  
 83\_s2pul1\_C13.fid pw90 9.700  
 ACQUISITION alfa 10.000  
 24509.8  
 SW 1.300 il n  
 at 63730 in n  
 np 17000 dp y  
 fs 64 hs nm  
 d1 2.000  
 nt 256 lb not used  
 ct 256 fn DISPLAY 1.00  
 TRANSMITTER C13 SP -1742.0  
 strq 100.542 WP 24508.1  
 lof 1042.7 rft 9483.6  
 tpwr 54 rfp 7740.9  
 pw 3.233 fp 138.5  
 DECOUPLER H1 lp -183.3  
 dn dn H1 PLOT 250  
 dof 0 wc 0  
 dm YYY SC 0  
 dmm W VS 16830  
 dpwr 44 tn 3  
 dmf 10200 at cdc ph

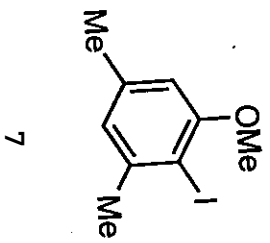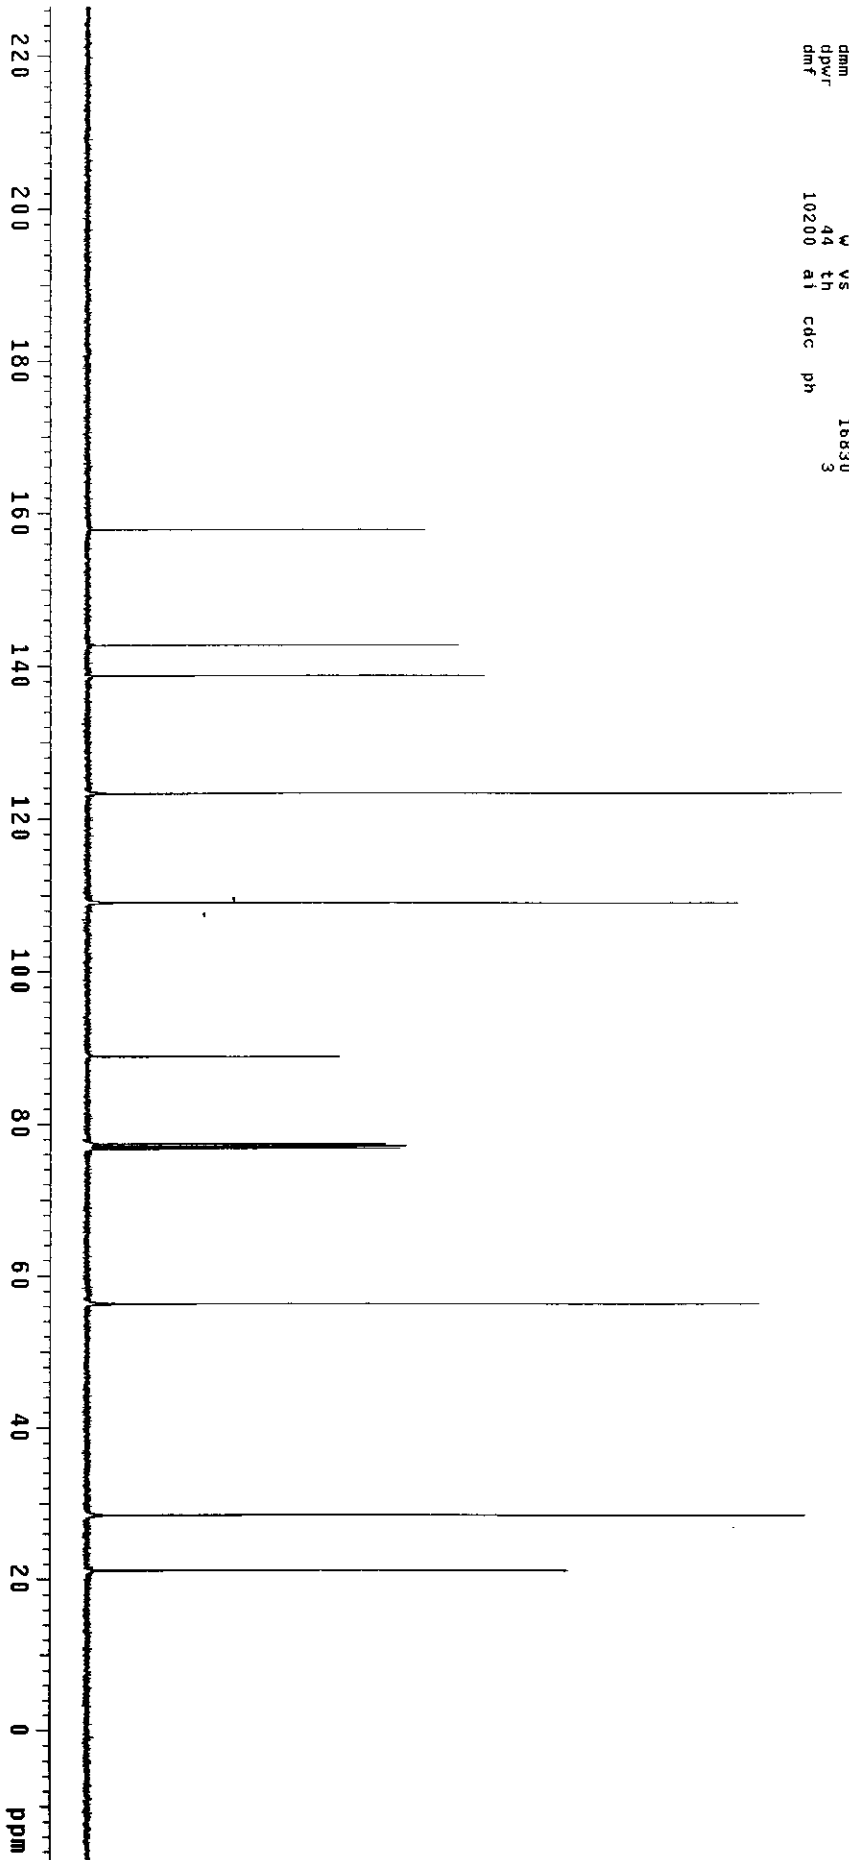

Supplement: NIHMS86540-supplement-1_si_001.pdf [file NIHMS86540-supplement-1_si_001.pdf]
